# Supplementary material
Source: Research Square preprint supplement (doi:10.21203/rs.3.rs-9263221/v1)
Supplement: Supplementary file 1 [file a44b16fa647e1fc383998eaf.docx]

**Appendix Table 10: Weather data at Sinana and Agarfa Experimental sites**

| Year | Sinana | | | | | Agarfa | | | | |
| --- | --- | --- | --- | --- | --- | --- | --- | --- | --- | --- |
| RF | Tmin | Tmax | RH | Wind | Rainfall | Tmin | Tmax | RH | Wind |
| 2012 | 781 | 118.9 | 246.1 | 557.6 | 31.9 | 901 | 114.4 | 241 | 532.3 | 23.8 |
| 2013 | 1032 | 116.9 | 235.8 | 648.7 | 30 | 1283 | 115.1 | 233.6 | 615.6 | 21.8 |
| 2014 | 855 | 117.1 | 238 | 624.8 | 31.7 | 1229 | 114 | 230.6 | 635 | 21.6 |
| 2015 | 714 | 120.5 | 248.2 | 567.2 | 32.9 | 662 | 116.6 | 243.8 | 533.3 | 23.6 |
| 2016 | 987 | 119.8 | 240.9 | 633.6 | 31.6 | 1108 | 118.4 | 239.9 | 593.7 | 22.7 |
| 2017 | 816 | 118.9 | 243.9 | 572.4 | 32.4 | 912 | 116 | 240.9 | 541.5 | 23.2 |
| 2018 | 996 | 116.7 | 236.2 | 615.3 | 31.5 | 894 | 115.7 | 234.2 | 583.8 | 22.1 |
| 2019 | 837 | 122.6 | 244.9 | 606.7 | 32.8 | 1087 | 119.3 | 241.2 | 596.7 | 22.8 |
| 2020 | 1001 | 119.9 | 237.5 | 651.6 | 30.2 | 1028 | 118.2 | 234.7 | 627.5 | 21.7 |
| 2021 | 580 | 119.6 | 247.5 | 548.8 | 33.9 | 1044 | 115.5 | 239 | 560.8 | 23 |

RF=Rainfall, Tmin=Temperature Minimum, Tmax= Temperature Maximum, Rh= Relative Humidity
