# Supplementary material
Source: Research Square preprint supplement (doi:10.21203/rs.3.rs-9263221/v1)
Supplement: Supplementary file 2 [file b3f9e25f06a128b2fe64da43.docx]

Appendix 1: Pedigree of Bread wheat advanced genotypes and Commercial varieties

| **S. N** | **Code or variety name** | **Pedigree** |
| --- | --- | --- |
| GM1 | BW172604 | KFA/2*KACHU/4/WBLL1*2/KURUKU//KRONSTAD F2004/3/WBLL1*2/BRAMBLING |
| GM2 | BW172608 | WHEAR//2*PRL/2*PASTOR/5/UP2338*2/SHAMA/3/MILAN/KAUZ//CHIL/CHUM18/4/UP2338*2/SHAMA/6/UP2338*2/KKTS*2//YANAC |
| GM3 | BW172619 | WBLL1*2/KKTS//PASTOR/KUKUNA/3/KINGBIRD #1//INQALAB 91*2/TUKURU/5/KAUZ//ALTAR 84/AOS/3/MILAN/KAUZ/4/SAUAL |
| GM4 | BW172620 | WBLL1*2/KKTS//PASTOR/KUKUNA/3/KINGBIRD #1//INQALAB 91*2/TUKURU/5/KAUZ//ALTAR 84/AOS/3/MILAN/KAUZ/4/SAUAL |
| GM5 | BW172831 | MEX94.27.1.20/3/SOKOLL//ATTILA/3*BCN/5/GK ARON/AG SECO 7846//2180/4/2*MILAN/KAUZ//PRINIA/3/BAV92 |
| GM6 | ETBW9080 | KACHU//WHEAR/SOKOLL |
| GM7 | BW172771 | PARUS/FRANCOLIN #1/3/PBW343*2/KUKUNA*2//FRTL/PIFED/4/PAURAQ/SUP152 |
| GM8 | BW172714 | MUCUY//MUTUS*2/TECUE #1 |
| GM9 | BW172713 | MUCUY//MUTUS*2/TECUE #1 |
| GM10 | EBW192357 | SUP152*2/TINKIO #1/4/FRET2*2/SHAMA//KIRITATI/2*TRCH/3/BAJ #1/5/SUP152*2/TINKIO #1 |
| GM11 | EBW192361 | KACHU*2/3/ND643//2*PRL/2*PASTOR/4/2*KACHU/DANPHE |
| GM12 | EBW192370 | KACHU/DANPHE/3/KACHU//KIRITATI/2*TRCH |
| GM13 | EBW192371 | KACHU/DANPHE/3/KACHU//KIRITATI/2*TRCH |
| GM14 | EBW192375 | ACHU/DANPHE/3/KACHU//KIRITATI/2*TRCH |
| GM15 | EBW192377 | KACHU/DANPHE/3/KACHU//KIRITATI/2*TRCH |
| GM16 | EBW192380 | KACHU/DANPHE/3/KACHU//KIRITATI/2*TRCH |
| GM17 | BW120042 | DANDA'A/HD3075 |
| GM18 | BW120053 | SHORIMA/HW5216#6 |
| GM19 | BW120060 | ALI-DORO/UP2797#2 |
| GM20 | BW120063 | SHORIMA/UP2797#2 |

Continued Appendix 1

| GM21 | BW172088 | W15.92/4/PASTOR//HXL7573/2*BAU/3/WBLL1/8/BOW/VEE/5/ND/VG9144//KAL/BB/3/YACO/4/CHIL/6/CASKOR/3/CROC_1/AE.SQUARROSA (224)//OPATA/7/PASTOR//MILAN/KAUZ/3/BAV92 |
| --- | --- | --- |
| GM22 | BW172093 | SOKOLL/3/PASTOR//HXL7573/2*BAU*2/6/OASIS/5*BORL95/5/CNDO/R143//ENTE/MEXI75/3/AE.SQ/4/2*OCI |
| GM23 | BW172440 | KUTZ//KFA/2*KACHU |
| GM24 | BW172474 | SITE/MO//PASTOR/3/TILHI/4/MUNAL #1/5/MUNAL/6/MUCUY |
| GM25 | BW173270 | TACUPETO F2001/SAUAL//BLOUK #1*2/3/PBW343*2/KUKUNA*2//FRTL/PIFED |
| GM26 | BW173353 | SAUAL/3/KAUZ/PASTOR//PBW343/4/KINGBIRD #1 |
| GM27 | BW182052 | SHORTENED SR26 TRANSLOCATION//2*WBLL1*2/KKTS/3/BECARD |
| GM28 | BW182122 | MAYIL/ZINCOL//ITP40/AKURI |
| GM29 | ETBW 9077 | SHORTENED SR26 TRANSLOCATION//2*WBLL1*2/KKTS/3/BECARD |
| GM30 | ETBW 9136 | 92.001E7.32.5/SLVS/5/NS-732/HER/3/PRL/SARA//TSI/VEE#5/4/FRET2/6/SOKOLL/3/PASTOR//HXL7573/2*BAU |
| GM31 | EBW192992 | ALTAR 84/AE.SQUARROSA (221)//3*BORL95/3/URES/JUN//KAUZ/4/WBLL1/5/KACHU/6/KIRITATI//PBW65/2*SERI.1B/7/PRL/2*PASTOR/3/PFAU/WEAVER*2//CHAPIO |
| GM32 | EBW192318 | SUP152/BAJ #1*2/3/KINGBIRD #1//INQALAB 91*2/TUKURU |
| GM33 | EBW192319 | ATTILA/3*BCN*2//BAV92/3/KIRITATI/WBLL1/4/DANPHE*2/5/BORL14 |
| GM34 | EBW192321 | FRAME//MILAN/KAUZ/3/PASTOR/4/SOKOLL/5/2*KACHU//WBLL1*2/BRAMBLING |
| GM35 | EBW192323 | METSO/ER2000//MONARCA F2007/3/WBLL1*2/KKTS/4/2*KFA/2*KACHU |
| GM36 | EBW192324 | KACHU/DANPHE//KFA/2*KACHU |
| GM37 | EBW192325 | KACHU/DANPHE//KFA/2*KACHU |
| GM38 | EBW192326 | KACHU/DANPHE//KFA/2*KACHU |
| GM39 | EBW192327 | KACHU/DANPHE//KFA/2*KACHU |
| GM40 | EBW192328 | KACHU//KIRITATI/2*TRCH/3/KACHU #1/KIRITATI//KACHU |
| GM41 | EBW192333 | ND643/2*WBLL1/4/WHEAR/KUKUNA/3/C80.1/3*BATAVIA//2*WBLL1/5/BORL14 |
| GM42 | EBW192343 | TRCH*2//ND643/2*WBLL1/3/BORL14 |
| GM43 | BWRVT-1 | KAUZ/STAR/3/MUNIA/ALTAR 84//MILAN/4/LEITH-1 |
| GM44 | BW182463 | FITIS |
| GM45 | BW182491 | KUTZ//KFA/2*KACHU |
| GM46 | BW182493 | KFA/2*KACHU//SUP152 |

Continued Appendix Table 2

| GM47 | BWRVT-2 | SKAUZ/2*STAR//ACHTAR/INRA1764/3/TEOCA+LR34/2*BORL95 |
| --- | --- | --- |
| GM48 | BW182540 | KFA/2*KACHU*2/3/ATTILA*2/PBW65//MURGA |
| GM49 | BW182623 | WBLL1*2/BRAMBLING//VORB/FISCAL/3/BECARD/5/ATTILA/3*BCN*2//BAV92/3/KIRITATI/WBLL1/4/DANPHE |
| GM50 | BW182714 | CHIPAK*2/3/KSW/SAUAL//SAUAL |
| GM51 | BW184055 | GOUMRIA-8//MILAN/PASTOR/3/TNMU/MILAN |
| GM52 | BW184123 | ATTILA 50Y//ATTILA/BCN/3/KAPSW/SHUHA_17/4/TNMU/MILAN |
| GM53 | BW184143 | HUHA_4//NS732/HER/3/TNMU/MILAN/4/BOW/PRL//BUC/3/WH576 |
| GM54 | BW184144 | GOUMRIA_8//MILAN/PASTOR/3/TNMU/MILAN |
| GM55 | BW184183 | AUZ//MON/CROW?S?/3/VEE/PJN//2*KAUZ |
| GM56 | BWRVT-3 | ATTILA*2/PBW65//PFAU/MILAN |
| GM57 | BWRVT-5 | TEMPORALERA M 87*2/TUKURU//FAYEQ-2 |
| GM58 | BWKU13206 | SHORIMA/GALAMA 515-2 |
| GM59 | BWKU13207 | SHORIMA/GALAMA 515-2 |
| GM60 | BWKU13208 | SHORIMA/GALAMA 515-2 |
| GM61 | EBW192986 | KACHU/KINDE//NELOKI/3/BORL14 |
| GM62 | EBW192988 | BABAX/LR42//BABAX*2/3/KUKUNA/4/CROSBILL #1/5/BECARD*2/6/KACHU/KIRITATI |
| GM63 | EBW192990 | MERCATO//JNRB.5/PIFED*2/3/SAUAL/YANAC//SAUAL |
| GM64 | EBW192005 | IT71/CPT//AE.SQUARROSA (629)/4/2*PASTOR//HXL7573/2*BAU/3/WBLL1 |
| GM65 | EBW192900 | BORL14//KFA/2*KACHU |
| GM66 | BWRVT-P#6 | SERI.1B//KAUZ/HEVO/3/AMAD/4/PFAU/MILAN |
| GM67 | ETBW 9616 |  |
| GM68 | EBW192913 | NADI/3/WBLL1*2/SHAMA//BAJ #1/4/NADI |
| GM69 | EBW192920 | FRANCOLIN #1//WBLL1*2/KURUKU/3/WBLL1*2/BRAMBLING//CHYAK |
| GM70 | EBW192921 | KINGBIRD #1//INQALAB 91*2/TUKURU/3/BECARD/FRNCLN |
| GM71 | ETBW 9116 |  |
| GM72 | EBW192923 | SUP152/BAJ #1//KFA/2*KACHU |

Continued Appendix Table

| GM73 | EBW192924 | SUP152/BAJ #1/7/ALTAR 84/AE.SQUARROSA (221)//3*BORL95/3/URES/JUN//KAUZ/4/WBLL1/5/KACHU/6/KIRITATI//PBW65/2*SERI.1B |
| --- | --- | --- |
| GM74 | EBW192925 | SUP152/BAJ #1/5/ATTILA/3*BCN*2//BAV92/3/KIRITATI/WBLL1/4/DANPHE |
| GM75 | EBW192927 | WBLL1*2/BRAMBLING//VORB/FISCAL/3/BECARD/5/ATTILA/3*BCN*2//BAV92/3/KIRITATI/WBLL1/4/DANPHE |
| GM76 | EBW192928 | WBLL1*2/BRAMBLING//VORB/FISCAL/3/BECARD/5/ATTILA/3*BCN*2//BAV92/3/KIRITATI/WBLL1/4/DANPHE |
| GM77 | ETBW 9129 |  |
| GM78 | EBW192939 | KACHU #1/KIRITATI//KACHU*2/3/BECARD/FRNCLN |
| GM79 | EBW192940 | KACHU//WBLL1*2/BRAMBLING*2/3/KACHU/KIRITATI |
| GM80 | EBW192031 | SOKOLL/WBLL1 |
| GM81 | BW182002 | MUCUY |
| GM82 | BW182037 | MUCUY//MUTUS*2/TECUE #1 |
| GM83 | BW182254 | KFA/2*KACHU*2//SUP152 |
| GM84 | BW182285 | KACHU//WBLL1*2/BRAMBLING/3/2*KFA/2*KACHU |
| GM85 | BW182297 | FD07072/FRANCOLIN #1/4/ATTILA*2/PBW65//MUU #1/3/FRANCOLIN #1 |
| GM86 | BW182442 | KACHU/KINDE//NELOKI/3/BORL14 |
| GM87 | BW182767 | MANKU/3/MUU/FRNCLN//FRANCOLIN #1 |
| GM88 | EBW192034 | KACHU/SAUAL/4/ATTILA*2/PBW65//PIHA/3/ATTILA/2*PASTOR |
| GM89 | EBW192856 | SUP152/AKURI//SUP152/3/MUCUY |
| GM90 | EBW192860 | SUP152/HUIRIVIS #1//2*BORL14 |
| GM91 | EBW192861 | KSW/SAUAL//SAUAL/3/TRCH/HUIRIVIS #1/5/UP2338*2/SHAMA/3/MILAN/KAUZ//CHIL/CHUM18/4/UP2338*2/SHAMA |
| GM92 | EBW192867 | WBLL1*2/BRAMBLING//WBLL1*2/BRAMBLING/3/2*BORL14 |
| GM93 | EBW192873 | MUTUS/ROLF07//MUCUY |
| GM94 | EBW192874 | MUTUS/AKURI//SUP152/BAJ #1 |
| GM95 | EBW192876 | KINGBIRD #1//INQALAB 91*2/TUKURU/3/BECARD/FRNCLN |
| GM96 | EBW192877 | SUP152/BAJ #1/3/KACHU//WBLL1*2/BRAMBLING |
| GM97 | EBW192880 | KACHU/BECARD//WBLL1*2/BRAMBLING/3/FRNCLN*2/TECUE #1 |
| GM98 | ETBW 9547 |  |

Continued Appendix Table1

| GM99 | Kingbard | TAM200/TUI/6/PVN//CAR422/ANA/5/BOW/CROW//BUC/PVN/3/YR/4/TRAP#1 |
| --- | --- | --- |
| GM100 | ETBW 9548 |  |
| GM101 | Kakaba | KIRITATI/SERI/RAYO |
| GM102 | Obora |  |
| GM103 | Pavon 76 | VCM//CNO"S"/7C/3/KAL/BB |
| GM104 | Boru | SAUAL/MUTUS/6/CNO79//PF70354/MUS/3/PASTOR/4/BAV92*2/5/FH6-1-7/7/CNO79//PF70354/MUS/3/PASTOR/4/BAV92*2/5/FH6-1-7 |
| GM105 | Sofumar |  |
| GM106 | Balcha | CROC_1/AE.SQUARROSA (213)//PGO/10/ ATTILA*2/9/KT/BAGE//FN/U/3/BZA/4/TRM/5/ALDAN/6/SERI/7/VEE#10/8/OPATA |
| GM107 | 20BWNE3(P#42) | GLADIUS/2*BAVIS |
| GM108 | ATLAS | HEILO//MILAN/MUNIA/3/KIRITATI/2*TR |
| GM109 | Lemu |  |
| GM110 | Wane | SOKOLL/EXCALIBUR |
| GM111 | Danbal |  |
| GM112 | Shorima | UTIQUE-96/3/PAYNE/BAGULA//MILAN; |
| GM113 | Hachalu | RANA96/SIDS-1 |
| GM114 | M/Walabu | TI/3/Fn/Th/Nar 59 *2/4/Bol'S' |
| GM115 | Mandoyu | WORRAKATTA/PASTOR |
| GM116 | Senate | 14F/HAR 1685 |
| GM117 | Galan | SERI.1B//KAUZ/HEVO/3/AMAD/4/FLAG-2 |
| GM118 | Hidasse | YANAC/3/PRL/SARA//TSI/VEE#5/4/CROC-1/AE.SQUAROSA(224)//OPATTA |
| GM119 | Digalu | SHA7/KAUZ |
| GM120 | Dure | BOW"S"/YD"S"/ZZ"S" |
| GM121 | Sinja | Dure/Madawalabu 2005 SNcr |

Appendix Table 2: Wheat Stem Rust Differential Genotypes (accessions deposited at the National Plant Germplasm-Aberdeen, ID)

| Number | Sr gene | genotypes | habit |
| --- | --- | --- | --- |
| 501 | Sr5 | ISr5-Ra | Spring |
| 502 | Sr21 | CnS_T_mono-derivative | Spring |
| 503 | Sr9e | Vernstein | Spring |
| 504 | Sr7b | ISr7b-Ra | Spring |
| 505 | Sr11 | ISr11-Ra | Spring |
| 506 | Sr6 | ISr6-Ra | Spring |
| 507 | Sr8a | ISr8a-Ra | Spring |
| 508 | Sr9g | Acme | Spring |
| 509 | Sr36 | W2691SrTt-1 | Spring |
| 510 | Sr9b | W2691Sr9b | Spring |
| 511 | Sr30 | BtSr30Wst | Spring |
| 512 | Sr17 (+Sr13) | Combination VII | Spring |
| 513 | Sr9a | ISr9a-Ra | Spring |
| 514 | Sr9d | ISr9d-Ra | Spring |
| 515 | Sr10 | W2691Sr10 | Spring |
| 516 | SrTmp | CnsSrTmp | Spring |
| 517 | Sr24 | LcSr24Ag | Spring |
| 518 | Sr31 | Sr31/6*LMPG | Spring |
| 519 | Sr38 | VPM1 | Winter |
| 520 | SrMcN | McNair 701 | Winter |
| NB: Source from Ambo Manual revised, Getaneh W0ldeab (PhD), Endale Hailu, Nestanet Bacha PhD) | | | |

Appendix Table 3: Phenotypic response to *pgt* races of 124 wheat genotypes /genotypes included in the study.

| GM | TTTTF | TTKTT | TTKTF | TKTTF | TTRTF | TTKSK | TKKTF |
| --- | --- | --- | --- | --- | --- | --- | --- |
| 1 | 3 | ;1 | 3- | ; | 2+ | ; | ;1+ |
| 2 | 3- | 3- | 3- | ;1 | 3 | 2+ | 3- |
| 3 | 3+ | ;1 | 3+ | ;1 | 3 | 2- | 2- |
| 4 | 3+ | ;1 | 2+ | ;1+ | 3 | ;1+ | ;1+ |
| 5 | ;1 | ;1 | 2+ | ;1 | 2+ | ; | ;1+ |
| 6 | 0 | ;1 | 2+ | 2- | 3 | ; | ;1 |
| 7 | 3- | 3 | 3+ | 2- | 3+ | ; | ;1+ |
| 8 | 0 | ;1 | 3+ | ;1 | 3+ | ; | ;1+ |
| 9 | ; | ;1+ | 2+ | ;1 | ; | ;1+ | 2- |
| 10 | 3+ | ; | 3+ | 3- | 3 | 2+ | 2- |
| 11 | 3- | 3+ | 3+ | 2+ | 3+ | 3+ | 2- |
| 12 | 3+ | 3+ | 3+ | ;1 | 3+ | 2 | 2- |
| 13 | 2+ | 2+ | 3+ | ;1 | 3+ | 2+ | 2- |
| 14 | 3+ | 3+ | 2+ | 2+ | 3+ | 3+ | 2- |
| 15 | 2 | ; | 3+ | 2 | 3 | 3 | 2- |
| 16 | 3- | ; | 3 | 2- | 3+ | ; | 2- |
| 17 | ;1 | ; | ;1 | ;1 | ;1 | ; | ;1+ |
| 18 | 2- | 3+ | ;1+ | ;1 | ;1+ | ;1 | ;1+ |
| 19 | 3- | ; | ;1+ | ;1+ | 3- | ;1+ | ;1+ |
| 20 | 3- | 0 | 3+ | 33- | 2 | 2+ | 2- |
| 21 | 3 | ; | 3+ | 3- | 3 | ; | 2- |
| 22 | 3- | 2+ | 3+ | 2 | 3+ | 3- | 2- |
| 23 | 3+ | ; | 3+ | ;1 | 3 | 3 | ;1+ |
| 24 | 3+ | 2+ | 3+ | 3 | 2- | 3 | 2 |
| 25 | 2+ | 3+ | 3 | ;1+ | 3- | ;1 | ;1+ |
| 26 | ;1+ | ;1+ | ;1+ | 2- | 2- | ;1+ | ;1+ |
| 27 | ;1 | ;1+ | ;1+ | ;1+ | 2+ | ;1 | ;1+ |
| 28 | 3+ | 3 | 3+ | 3- | 3- | 2+ | 2- |
| 29 | ;1 | ; | ;1+ | ;1 | 2- | ;1+ | ;1+ |
| 30 | 2- | ; | 2+ | 3 | 3+ | 2+ | ;1+ |
| 31 | 3+ | 3- | 3+ | 3- | 3- | 3- | 3- |
| 32 | 2+ | ;1 | 3 | 3- | 3- | 3- | 2- |
| 33 | 2- | ; | 2+ | 2- | 3+ | 2+ | ;1+ |
| 34 | 3+ | ;1 | 3+ | 2- | 3- | 2- | 2- |
| 35 | 3- | 0 | 4 | 3- | 2+ | 2- | 2- |

Appendix Table 3: Continued, phenotype response

| GM | TTTTF | TTKTT | TTKTF | TKTTF | TTRTF | TTKSK | TKKTF |
| --- | --- | --- | --- | --- | --- | --- | --- |
| 36 | 3+ | ; | 3+ | ;1 | 2+ | 3+ | 2- |
| 37 | 3+ | 3+ | 3- | 3 | 2 | 3+ | 2+ |
| 38 | 3+ | 2+ | 3+ | 4 | 3 | 2+ | 2+ |
| 39 | 3+ | 0 | 2+ | 3- | 3- | 3+ | 2+ |
| 40 | 3+ | 3- | 3+ | ;1 | 3- | 3+ | 2+ |
| 41 | 4 | 0 | 3 | ;1 | 3 | ;1 | ;1+ |
| 42 | ;1 | ; | 2+ | ;1+ | 3- | ;1+ | 2- |
| 43 | 2- | ; | ;1 | ;1+ | ;1 | ;1 | ;1+ |
| 44 | ;1+ | 0 | ;1 | ;1+ | ; | ;1 | ;1+ |
| 45 | 3 | 2+ | 3+ | 3- | ;1 | ; | 2- |
| 46 | 3+ | ; | 3 | 3 | 3+ | 2 | 2- |
| 47 | 0 | ;1 | 2+ | ;1 | ;1 | ;1 | ;1+ |
| 48 | 3+ | 2+ | 3- | 3- | 3 | ;1+ | ;1+ |
| 49 | 3 | 3- | 2+ | 2- | 3 | 2 | ;1+ |
| 50 | ;1 | ;1+ | 2 | 3- | 3 | 3- | 2- |
| 51 | 2- | 3- | 3+ | ;1+ | 2 | 3 | 2+ |
| 52 | 2 | ;1 | 3- | ;1 | 2- | ;1 | ;1+ |
| 53 | 3+ | ;1 | ;1 | ;1+ | 2- | 2+ | ;1+ |
| 54 | 2 | 2+ | 3+ | ;1+ | 2+ | 3 | ;1+ |
| 55 | 3- | 3- | ;1 | ;1+ | 2+ | ;1 | ;1+ |
| 56 | 3 | ; | 3- | 2- | 3- | ;1+ | ;1+ |
| 57 | 3 | 3- | 3+ | 2- | 2+ | 3- | ;1+ |
| 58 | 2 | ;1+ | ;1+ | 2- | 3+ | ;1+ | 2- |
| 59 | ;1 | ; | ; | 3 | ;1 | ;1 | ;1+ |
| 60 | 3 | 3- | ;1 | 2- | 3+ | 3+ | ;1+ |
| 61 | 3+ | ;1 | 3 | 3- | 3+ | 2+ | ;1+ |
| 62 | 3+ | 3- | 3 | 3 | 3+ | 3+ | 2- |
| 63 | 3- | 0 | 3- | 3 | 3 | ;1+ | ;1+ |
| 64 | 3 | 3- | 3 | ;1 | 3- | 3+ | 2- |
| 65 | 3 | 3- | 3+ | 2- | 3+ | 3+ | ;1 |
| 66 | ;1 | 2+ | 3 | 2- | 3- | ;1+ | ;1+ |
| 67 | 2- | 3- | ;1+ | 3- | 2 | ;1+ | ;1+ |
| 68 | 4 | 3- | 3+ | 3- | 3+ | 3+ | ;1+ |
| 69 | 3+ | 3 | 3+ | 2- | 3- | ;1+ | ;1+ |
| 70 | 3 | 3+ | 3+ | ;1+ | 3+ | 2+ | ;1+ |
|  |  |  |  |  |  |  |  |

Appendix Table 3: Continued, phenotype response

| GM | TTTTF | TTKTT | TTKTF | TKTTF | TTRTF | TTKSK | TKKTF |
| --- | --- | --- | --- | --- | --- | --- | --- |
| 71 | ;1 | ;1+ | 3+ | ;1+ | 3+ | 3+ | 2- |
| 72 | 3+ | 2 | 2 | 3- | 3- | 3+ | 2- |
| 73 | ;1 | 3 | 2+ | 3- | 3+ | 3 | 2- |
| 74 | 3- | 3- | 3+ | 3- | 3- | 3 | 2- |
| 75 | 3+ | 3+ | 3+ | 2+ | 3- | 3+ | 2- |
| 76 | 3- | 3 | 3+ | 2+ | 3+ | 2+ | 2- |
| 77 | 3- | ;1 | ;1+ | 2- | 3- | 2+ | ;1+ |
| 78 | 3- | 3 | 3+ | 2- | 3- | ;1+;1 | ;1+ |
| 79 | ;1+ | ; | 2 | 2- | 3- | ;1 | ;1 |
| 80 | 3+ | ; | 3- | ;1 | 3- | 2+ | ;1+ |
| 81 | ;1+ | 3+ | 3+ | ;1+ | 3- | 3 | 2- |
| 82 | ;1 | 2 | 2+ | 2- | ;1+ | ;1+ | ;1+ |
| 83 | 2- | 3 | 3- | 2- | 3- | 2+ | 2+ |
| 84 | 3 | 3 | 3+ | 2- | 3+ | 3+ | 2+ |
| 85 | 3 | 2 | 3 | ;1+ | 2 | 2+ | ;1+ |
| 86 | 2- | 33+ | 3+ | 2- | ; | 2+ | ;1+ |
| 87 | ;1+ | ;1 | ;1+ | ;1+ | ;1+ | ;1+ | ;1+ |
| 88 | 3 | 3+ | 3+ | ;1+ | 3- | 2+ | ;1 |
| 89 | 2+ | ; | 3+ | 2- | 3- | 2+ | ;1 |
| 90 | 2+ | 2- | ;1+ | 2- | 3- | 2+ | ;1+ |
| 91 | ;1 | ;1 | ; | ;1 | ;1+ | ; | ;1 |
| 92 | 2+ | ;1 | 3+ | 2- | 3+ | 3+ | ;1+ |
| 93 | 3 | ;1 | 3+ | 2- | 2+ | 3- | ;1+ |
| 94 | ; | 3 | 3- | 3- | 3+ | 2+ | 2+ |
| 95 | 3+ | 3 | 2+ | ;1+ | 3- | 2+ | ;1+ |
| 96 | ;1 | 3 | 3+ | 2- | 3- | ;1+ | 2- |
| 97 | 3+ | 3 | 3+ | 2+ | 3- | 3- | ;1+ |
| 98 | ; | 3- | 2 | ;1 | 2+ | ;1+ | ;1 |
| 99 | 3+ | 3+ | 3+ | 2+ | 3- | 3+ | 2- |
| 100 | 0 | ; | 2+ | ;1 | 3- | 3+ | ;1 |
| 101 | ;1 | 3 | 3+ | 3- | 3- | 3+ | 2- |
| 102 | ;1 | ;1 | ;1 | ;1 | ;1 | ;1 | ;1+ |
| 103 | 2 | 3+ | 2 | 2+ | 2+ | 3- | ;1+ |
| 104 | 3+ | 2- | 2 | 3 | 2+ | 3- | ;1+ |

Appendix Table 3: Continued, phenotype response

| GM | TTTTF | TTKTT | TTKTF | TKTTF | TTRTF | TTKSK | TKKTF |
| --- | --- | --- | --- | --- | --- | --- | --- |
| 105 | 3- | 2+ | ;1+ | 2+ | 2+ | 3+ | ;1+ |
| 106 | 3- | 3- | 3+ | 3+ | 3- | 2- | ;1+ |
| 107 | 3- | 3+ | 3+ | ;1+ | ;1+ | 3+ | 2- |
| 108 | ;1 | ; | ;1 | ;1 | ;1+ | 2 | ;1+ |
| 109 | ;1 | ; | ;1+ | ;1+ | ;1 | ;1+ | ;1+ |
| 110 | ;1 | 3+ | ;1+ | 2- | ;1+ | ;1+ | ;1+ |
| 111 | ;1 | ; | 2+ | 2- | ;1+ | ;1+ | ;1+ |
| 112 | ;1 | 3- | 2+ | ;1+ | 2+ | ; | ;1+ |
| 113 | 3- | 3- | 3+ | 2- | 2+ | 2+ | ;1+ |
| 114 | 3+ | 3+ | 3+ | ;1+ | 3 | 3- | ;1+ |
| 115 | ;1+ | ;1 | ;1+ | ;1+ | ;1+ | ;1 | ;1+ |
| 116 | 3 | 3- | ;1+ | ;1+ | ;1 | ;1 | ;1+ |
| 117 | ;1 | ; | ;1+ | ;1+ | 2 | ;1 | ;1+ |
| 118 | 3+ | 3+ | 3+ | 3- | 3 | 3- | 2+ |
| 119 | 3+ | 3 | 3+ | 3- | 3- | 3+ | ;1+ |
| 120 | ;1 | ; | ;1 | 2- | ;1 | ;1+ | ;1+ |
| 121 | ;1 | 2- | ;1 | ;1+ | ; | ;1 | 2- |
| 122 | 4 | 3 | 3 | 3 | 3+ | 4 | 2- |
| 123 | 3+ | 2- | 3 | 3- | 3 | 2+ | 2- |
| 124 | 3- | 3- | 2+ | 3- | 3 | 3 | 2- |
| 125 | 3 | 3 | 3 | 3 | 3 | 3 | 3 |

Appendix Table 4. Differential genotypes Used

| genotypes | REP | TTTTF | TTKTT | TTKTF | TKKTF | TKTTF | TTRTF | TTKSK |
| --- | --- | --- | --- | --- | --- | --- | --- | --- |
| Sr5 | 1 | 3 | 3 | 3 | 3 | 3+ | 3+ | 3+ |
| Sr21 | 1 | 3+ | 3 | 3 | 3- | 3 | 3 | 3+ |
| Sr9e | 1 | 3+ | 3+ | 3 | 3+ | 3- | 3- | 3- |
| Sr7b | 1 | 3+ | 3 | 3- | 3 | 3 | 3 | 3 |
| Sr11 | 1 | 3 | 4 | 3 | ;1+ | 2- | 3+ | 3 |
| Sr6 | 1 | 3+ | 3 | 3 | 3 | 3- | 3+ | 3 |
| Sr8a | 1 | 3+ | 3 | 3 | 3 | 3+ | 3- | 3 |
| Sr9g | 1 | 3 | 3- | 3- | 3 | 3 | 3 | 3- |
| Sr36 | 1 | 3+ | 2- | 2 | 2- | 3- | 3- | ;1+ |
| Sr9b | 1 | 3+ | 3 | 3- | 3+ | 3- | 3 | 3- |
| Sr30 | 1 | 3+ | 3 | 3+ | 3+ | 3 | 2 | 3- |
| Sr17(+sr13) | 1 | 2+ | 2+ | 2+ | 2+ | 2+ | 2+ | 2+ |
| Sr9a | 1 | 3- | 3 | 3- | 3+ | 3- | 3+ | 3 |
| Sr9d | 1 | 3- | 3 | 3+ | 3- | 3- | 3- | 3 |
| Sr10 | 1 | 3- | 3 | 3+ | 3 | 3 | 3 | 3 |
| SrTmp | 1 | 3- | 3- | 3+ | 3+ | 3+ | 3 | 2- |
| Sr24 | 1 | ;1+ | 4 | 2+ | 2+ | ;1+ | 2 | ;1 |
| Sr31 | 1 | ;1 | 3- | ;1 | ;1+ | ;1 | ;1 | 3 |
| Sr38 | 1 | 3 | 3 | 3 | 3 | 3- | 3- | 3 |
| SrMCN | 1 | 3- | 3+ | 3 | 3- | 3 | 3 | 3 |
| Sr5 | 2 | 3 | 3- | 3- | 3- | 3 | 3+ | 3+ |
| Sr21 | 2 | 3+ | 3 | 3+ | 3- | 3 | 3 | 3 |
| Sr9e | 2 | 3+ | 3+ | 3 | 3- | 3+ | 3- | 3 |
| Sr7b | 2 | 3+ | 3+ | 3 | 3- | 3+ | 3 | 3 |
| Sr11 | 2 | 3 | 4 | 3+ | ;1+ | ;1+ | 3+ | 3 |
| Sr6 | 2 | 3+ | 3 | 3 | 3- | 3- | 3 | 3 |
| Sr8a | 2 | 3+ | 3+ | 3+ | 3 | 3+ | 3- | 3 |
| Sr9g | 2 | 3 | 3- | 3- | 3 | 3 | 3 | 3 |
| Sr36 | 2 | 3+ | 2- | 2- | 2- | 3- | 3 | ;1+ |
| Sr9b | 2 | 3+ | 3 | 3 | 3 | 3- | 3 | 3 |
| Sr30 | 2 | 3+ | 3 | 3 | 3 | 3- | ;1+ | 3+ |
| Sr17(+sr13) | 2 | 2+ | 2+ | 2+ | 2+ | 2+ | 2+ | 2+ |
| Sr9a | 2 | 3- | 3+ | 3+ | 3+ | 3- | 3+ | 3 |
| Sr9d | 2 | 3- | 3 | 3 | 3- | 3 | 3- | 3+ |
| Sr10 | 2 | 3- | 3 | 3+ | 3 | 3 | 3 | 3+ |
| SrTmp | 2 | 3- | 3- | 3 | 3- | 3+ | 3 | 2+ |
| Sr24 | 2 | ;1+ | 4 | 2- | 2+ | ;1+ | 2- | ;1 |
| Sr31 | 2 | ;1 | 3- | ;1+ | ;1+ | ;1 | ;1 | 3+ |
| Sr38 | 2 | 3 | 3 | 3+ | 3 | 3 | 3- | 3+ |
| SrMCN | 2 | 3- | 3+ | 3 | 3- | 3+ | 3 | 3+ |

Appendix Table 5 : CI, ACI, AUDPC, rAUDPC. r-values and final rust severity in wheat genotypes to stem rust at Sinana and Agarfa.

| GM. | Sinana | |  |  | |  | |  | | Agarfa | | | |  |
| --- | --- | --- | --- | --- | --- | --- | --- | --- | --- | --- | --- | --- | --- | --- |
| FRS | CI | ACI | AUDPC | rAUDPC | | r-value | | FRS | CI | ACI | AUDPC | rAUDPC | r-value |
| 1 | 25s | 25 | 14 | 517.8 | 31.1 | | **0.03** | | 10ms | 8 | 4 | 133 | 15 | 0.02 |
| 2 | 30s | 30 | 17 | 605.5 | 36.4 | | 0.02 | | 15ms | 12 | 8 | 253 | 57 | 0.01 |
| 3 | 40s | 40 | 20 | 691.3 | 41.6 | | 0.03 | | 15m | 9 | 4 | 155 | 18 | 0.02 |
| 4 | 30mss | 27 | 14 | 483.0 | 58.1 | | 0.04 | | 10m | 6 | 2 | 67 | 8 | 0.01 |
| 5 | 25ms | 20 | 11 | 385.0 | 23.2 | | 0.03 | | 15ms | 12 | 4 | 137 | 15 | 0.03 |
| 6 | 30s | 30 | 17 | 593.3 | 35.7 | | 0.03 | | 10m | 6 | 4 | 114 | 13 | 0.02 |
| 7 | 30s | 30 | 15 | 495.3 | 29.8 | | 0.03 | | 5s | 5 | 3 | 83 | 19 | 0.02 |
| 8 | 25s | 25 | 12 | 399.0 | 24.0 | | 0.04 | | 5s | 5 | 3 | 95 | 11 | 0.02 |
| 9 | trs | 1 | 1 | 29.1 | 1.7 | | 0.001 | | trs | 1 | 1 | 29 | 3 | 0.01 |
| 10 | 30s | 30 | 17 | 584.5 | 35.2 | | 0.04 | | 25ms | 20 | 8 | 276 | 31 | 0.02 |
| 11 | 40s | 40 | 24 | 868.0 | 52.2 | | 0.04 | | 30m | 18 | 7 | 201 | 23 | 0.03 |
| 12 | 50s | 50 | 26 | 920.2 | 55.3 | | 0.063 | | 40s | 40 | 16 | 480 | 54 | 0.05 |
| 13 | 50s | 50 | 22 | 773.2 | 46.5 | | 0.05 | | 40s | 40 | 13 | 403 | 45 | 0.05 |
| 14 | 50s | 50 | 26 | 896.0 | 53.9 | | 0.13 | | 40s | 40 | 16 | 510 | 58 | 0.05 |
| 15 | 40s | 40 | 23 | 850.5 | 51.2 | | 0.03 | | 30ms | 24 | 8 | 238 | 27 | 0.04 |
| 16 | 30s | 30 | 21 | 457.8 | 45.5 | | 0.10 | | 40s | 40 | 13 | 480 | 54 | 0.14 |
| 17 | 10s | 10 | 4 | 147.2 | 8.9 | | 0.02 | | 5m | 3 | 1 | 15 | 2 | 0.05 |
| 18 | 40s | 40 | 18 | 766.0 | 46.1 | | 0.03 | | 30s | 30 | 11 | 350 | 40 | 0.04 |
| 19 | 40s | 40 | 27 | 962.5 | 57.9 | | 0.04 | | 30s | 30 | 11 | 354 | 40 | 0.04 |
| 20 | 30s | 30 | 30 | 537.3 | 32.3 | | 0.04 | | 25ms | 20 | 7 | 214 | 24 | 0.03 |
| 21 | 20ms | 16 | 12 | 437.5 | 26.3 | | 0.03 | | 20ms | 16 | 8 | 262 | 30 | 0.02 |
| 22 | 40s | 40 | 25 | 896.0 | 53.9 | | 0.11 | | 30s | 30 | 10 | 303 | 34 | 0.04 |
| 23 | 40s | 40 | 23 | 803.3 | 48.3 | | 0.04 | | 25ms | 20 | 8 | 261 | 29 | 0.02 |
| 24 | 50s | 50 | 31 | 997.79 | 67.3 | | 0.05 | | 25ms | 20 | 8 | 264 | 30 | 0.03 |
| 25 | 50s | 50 | 26 | 936.3 | 56.3 | | 0.03 | | 20ms | 16 | 8 | 287 | 32 | 0.01 |
| 26 | 20M | 12 | 9 | 333.9 | 20.1 | | 0.03 | | 25ms | 20 | 7 | 238 | 27 | 0.04 |
| 27 | 20MR | 8 | 7 | 281.4 | 16.9 | | 0.03 | | 15Ms | 12 | 8 | 273 | 31 | 0.02 |

Appendix Table 5: **Continued CI, ACI, AUDPC,** rAUDPC**. r-values and final rust severity in wheat genotypes to stem rust at Sinana and Agarfa.**

| Geno | Sinana | |  |  |  | | |  |  | | Agarfa |  |  |  |
| --- | --- | --- | --- | --- | --- | --- | --- | --- | --- | --- | --- | --- | --- | --- |
| FRS | CI | ACI | AUDPC | rAUDPC | r-value | FRS | | | CI | ACI | AUDPC | rAUDPC | r-value |
| 28 | 30S | 30 | 18 | 627.9 | 37.8 | 0.04 | 20s | | | 20 | 4 | 148 | 17 | 0.03 |
| 29 | 10MS | 8 | 6 | 207.9 | 12.5 | 0.02 | 15mr | | | 9 | 2 | 52 | 6 | 0.03 |
| 30 | 25MS | 20 | 11 | 416.0 | 25.0 | 0.04 | 10m | | | 20 | 2 | 70 | 8 | 0.02 |
| 31 | 15S | 15 | 10 | 365.8 | 22.0 | 0.01 | 15m | | | 9 | 4 | 83 | 19 | 0.01 |
| 32 | 25MS | 20 | 12 | 435.8 | 26.2 | 0.02 | 20m | | | 12 | 5 | 203 | 23 | 0.01 |
| 33 | 30S | 30 | 18 | 661.5 | 39.8 | 0.04 | 20m | | | 12 | 6 | 199 | 22 | 0.02 |
| 34 | 25MSS | 22.5 | 14 | 494.4 | 37.1 | 0.02 | 20ms | | | 16 | 6 | 125 | 28 | 0.03 |
| 35 | 15S | 15 | 7 | 231.9 | 13.9 | 0.03 | 5m | | | 3 | 1 | 40 | 5 | 0.09 |
| 36 | 50S | 50 | 25 | 867.3 | 52.2 | 0.06 | 20ms | | | 16 | 6 | 188 | 21 | 0.03 |
| 37 | 50S | 50 | 20 | 682.5 | 41.1 | 0.05 | 10mss | | | 9 | 3 | 99 | 11 | 0.07 |
| 38 | 30S | 30 | 15 | 514.5 | 30.9 | 0.04 | 15m | | | 9 | 3 | 94 | 11 | 0.02 |
| 39 | 25S | 25 | 12 | 412.0 | 24.8 | 0.04 | 20mss | | | 18 | 5 | 202 | 23 | 0.03 |
| 40 | 30S | 30 | 16 | 548.5 | 33.0 | 0.05 | 15ms | | | 12 | 4 | 124 | 14 | 0.02 |
| 41 | 15MS | 12 | 4 | 137.6 | 8.3 | 0.02 | 5m | | | 3 | 1 | 40 | 5 | 0.01 |
| 42 | 15M | 9 | 8 | 291.2 | 17.5 | 0.03 | 20m | | | 12 | 3 | 83 | 9 | 0.06 |
| 43 | 20M | 12 | 9 | 322.0 | 19.4 | 0.03 | 20m | | | 12 | 5 | 160 | 18 | -0.03 |
| 44 | 25MS | 20 | 13 | 447.7 | 26.9 | 0.03 | 10mr | | | 4 | 1 | 36 | 4 | 0.01 |
| 45 | 5MS | 4 | 3 | 91.4 | 5.5 | 0.02 | 5ms | | | 4 | 1 | 38 | 4 | 0.01 |
| 46 | 10MS | 8 | 3 | 106.8 | 6.4 | 0.02 | 15ms | | | 12 | 3 | 103 | 12 | 0.02 |
| 47 | 5MS | 4 | 3 | 78.8 | 4.7 | 0.01 | 10m | | | 6 | 4 | 150 | 17 | 0.01 |
| 48 | 10MSS | 8 | 5 | 165.2 | 9.9 | 0.02 | 5m | | | 3 | 2 | 51 | 6 | 0.01 |
| 49 | 20MS | 16 | 9 | 315.0 | 18.9 | 0.02 | 10mss | | | 9 | 6 | 214 | 24 | 0.01 |
| 50 | 5M | 3 | 3 | 73.5 | 4.4 | 0.01 | 20ms | | | 16 | 6 | 187 | 21 | 0.04 |
| 51 | 25MS | 20 | 16 | 570.5 | 34.3 | 0.03 | 15ms | | | 12 | 3 | 123 | 14 | 0.02 |
| 52 | 25MSS | 22.5 | 12 | 393.8 | 23.7 | 0.04 | 15ms | | | 12 | 5 | 142 | 16 | 0.03 |
| 53 | 40S | 40 | 15 | 514.2 | 30.9 | 0.04 | 15ms | | | 12 | 4 | 133 | 15 | 0.02 |
| 54 | 30S | 30 | 16 | 568.4 | 34.2 | 0.04 | 20ms | | | 16 | 9 | 289 | 33 | 0.02 |

Appendix Table 5: Continued CI, ACI, AUDPC, rAUDPC. r-values and final rust severity at Sinana and Agarfa.

| GM. | Sinana | |  |  | |  | |  | | Agarfa | | | |  |
| --- | --- | --- | --- | --- | --- | --- | --- | --- | --- | --- | --- | --- | --- | --- |
| FRS | CI | ACI | AUDPC | rAUDPC | | r-value | | FRS | CI | ACI | AUDPC | rAUDPC | r-value |
| 55 | 40S | 26 | 27 | 945.0 | 56.8 | | 0.04 | | 20ms | 16 | 7 | 273 | 31 | 0.03 |
| 56 | 30S | 15 | 16 | 538.3 | 32.4 | | 0.04 | | 30s | 30 | 11 | 340 | 38 | 0.04 |
| 57 | 25S | 18 | 18 | 638.8 | 38.4 | | 0.03 | | 10m | 6 | 3 | 103 | 12 | 0.02 |
| 58 | 30MS | 15 | 16 | 525.0 | 31.6 | | 0.03 | | 15m | 9 | 5 | 150 | 17 | 0.02 |
| 59 | 40S | 23 | 23 | 815.5 | 49.1 | | 0.03 | | 20ms | 16 | 9 | 284 | 32 | 0.08 |
| 60 | 40S | 20 | 17 | 689.2 | 41.5 | | 0.04 | | 20m | 12 | 5 | 159 | 18 | 0.02 |
| 61 | 30S | 17 | 15 | 584.5 | 35.2 | | 0.03 | | 10ms | 8 | 3 | 97 | 11 | 0.04 |
| 62 | 15M | 5 | 4 | 150.2 | 9.0 | | 0.03 | | 10m | 6 | 3 | 107 | 12 | 0.02 |
| 63 | 5S | 2 | 2 | 52.9 | 3.2 | | 0.01 | | 10m | 6 | 2 | 56 | 6 | 0.03 |
| 64 | 30S | 12 | 10 | 414.6 | 24.9 | | 0.03 | | 25ms | 20 | 7 | 222 | 25 | 0.03 |
| 65 | 5MS | 1 | 1 | 40.3 | 2.9 | | 0.01 | | 5m | 3 | 2 | 56 | 6 | 0.01 |
| 66 | 25Ms | 12 | 11 | 433.3 | 26.1 | | 0.03 | | 20m | 12 | 4 | 144 | 16 | 0.03 |
| 67 | 10ms | 3 | 3 | 82.3 | 4.9 | | 0.02 | | 10m | 6 | 3 | 89 | 10 | 0.02 |
| 68 | 30MSS | 17 | 16 | 617.8 | 37.2 | | 0.03 | | 10ms | 8 | 4 | 173 | 20 | 0.01 |
| 69 | 5S | 3 | 3 | 95.7 | 5.8 | | 0.02 | | 5ms | 4 | 2 | 44 | 5 | 0.01 |
| 70 | 15MSS | 8 | 7 | 268.6 | 16.2 | | 0.09 | | 15ms | 12 | 3 | 270 | 15 | 0.02 |
| 71 | 15MS | 7 | 7 | 239.8 | 14.4 | | 0.03 | | 10ms | 8 | 4 | 161 | 18 | 0.01 |
| 72 | 20MS | 9 | 10 | 315.0 | 18.9 | | 0.02 | | 10ms | 8 | 3 | 133 | 15 | 0.02 |
| 73 | 20MS | 10 | 10 | 353.5 | 21.3 | | 0.05 | | 10m | 6 | 3 | 120 | 14 | 0.02 |
| 74 | 30MS | 18 | 16 | 628.3 | 37.8 | | 0.03 | | 10ms | 8 | 5 | 165 | 19 | 0.02 |
| 75 | 20MS | 9 | 8 | 323.8 | 19.5 | | 0.01 | | 10mss | 9 | 5 | 184 | 21 | 0.01 |
| 76 | 25MSS | 12 | 13 | 432.3 | 26.0 | | 0.04 | | 15ms | 12 | 5 | 170 | 19 | 0.03 |
| 77 | 10MS | 3 | 3 | 120.8 | 7.3 | | 0.02 | | 10ms | 8 | 4 | 166 | 19 | 0.01 |
| 78 | 15MS | 7 | 7 | 241.5 | 14.5 | | 0.01 | | 15ms | 12 | 6 | 228 | 26 | 0.02 |
| 79 | TRS | 1 | 1 | 28.5 | 1.7 | | 0.03 | | Trm | 0.6 | 1 | 18 | 2 | 0.00 |
| 80 | 40S | 23 | 22 | 811.1 | 48.8 | | 0.03 | | 15ms | 12 | 4 | 100 | 11 | 0.02 |
| 81 | 30S | 16 | 18 | 564.6 | 34.0 | | 0.04 | | 40s | 40 | 13 | 397 | 45 | 0.05 |

Appendix Table 5: Continued

| GM. | Sinana | |  |  | |  | |  | | Agarfa | | | |  |
| --- | --- | --- | --- | --- | --- | --- | --- | --- | --- | --- | --- | --- | --- | --- |
| FRS | CI | ACI | AUDPC | rAUDPC | | r-value | | FRS | CI | ACI | AUDPC | rAUDPC | r-value |
| 82 | 20s | 20 | 12 | 455.0 | 27.4 | | 0.02 | | 15ms | 12 | 6 | 220 | 25 | 0.03 |
| 83 | Trs | 1 | 1 | 29.1 | 1.7 | | 0.00 | | 10m | 6 | 2 | 69 | 8 | 0.03 |
| 84 | 5MS | 4 | 1 | 43.4 | 2.6 | | 0.01 | | 5s | 5 | 2 | 48 | 5 | 0.01 |
| 85 | 40S | 40 | 24 | 824.3 | 49.6 | | 0.05 | | 5s | 5 | 2 | 54 | 6 | 0.01 |
| 86 | 20S | 20 | 7 | 248.5 | 14.9 | | 0.03 | | 20mss | 18 | 7 | 218 | 25 | 0.03 |
| 87 | 20MS | 16 | 11 | 344.4 | 20.7 | | 0.03 | | 20m | 12 | 4 | 95 | 11 | 0.04 |
| 88 | 30S | 30 | 20 | 645.8 | 38.8 | | 0.03 | | 25ms | 20 | 10 | 350 | 40 | 0.04 |
| 89 | 40S | 40 | 19 | 621.6 | 37.4 | | 0.06 | | 30s | 30 | 8 | 210 | 24 | 0.04 |
| 90 | 40S | 40 | 22 | 785.8 | 47.3 | | 0.04 | | 30s | 40 | 14 | 462 | 52 | 0.03 |
| 91 | 50S | 50 | 31 | 1093.8 | 65.8 | | 0.05 | | 30s | 30 | 13 | 406 | 46 | 0.03 |
| 92 | 40S | 40 | 27 | 822.5 | 49.5 | | 0.04 | | 20ms | 16 | 9 | 290 | 33 | 0.03 |
| 93 | 40S | 40 | 25 | 892.5 | 53.7 | | 0.04 | | 25ms | 20 | 6 | 172 | 19 | 0.03 |
| 94 | 40S | 40 | 28 | 857.5 | 57.9 | | 0.04 | | 30s | 30 | 14 | 450 | 51 | 0.03 |
| 95 | 30S | 30 | 20 | 715.8 | 43.1 | | 0.07 | | 20ms | 16 | 7 | 221 | 25 | 0.01 |
| 96 | 25S | 25 | 17 | 603.8 | 36.3 | | 0.02 | | 15ms | 12 | 7 | 236 | 27 | 0.01 |
| 97 | 30MS | 24 | 18 | 561.8 | 33.8 | | 0.04 | | 30mss | 27 | 11 | 371 | 42 | 0.04 |
| 98 | 10S | 10 | 3 | 124.6 | 7.5 | | 0.02 | | 10ms | 8 | 2 | 67 | 8 | 0.01 |
| 99 | 15S | 15 | 8 | 262.0 | 15.8 | | 0.03 | | 25m | 15 | 5 | 177 | 20 | 0.03 |
| 100 | 5s | 5 | 2 | 71.1 | 4.3 | | 0.01 | | trmr | 0.4 | 0 | 6 | 1 | 0.02 |
| 101 | 30s | 30 | 16 | 537.1 | 32.3 | | 0.04 | | 15sms | 13.5 | 5 | 159 | 18 | 0.03 |
| 102 | 40s | 40 | 21 | 790.3 | 47.5 | | 0.05 | | 30s | 30 | 10 | 316 | 36 | 0.04 |
| 103 | 20ms | 16 | 8 | 272.3 | 16.4 | | 0.03 | | 10m | 6 | 2 | 55 | 6 | 0.04 |
| 104 | 20ms | 16 | 10 | 346.5 | 20.8 | | 0.02 | | 10ms | 8 | 3 | 104 | 12 | 0.02 |
| 105 | 15ms | 12 | 6 | 206.5 | 12.4 | | 0.03 | | 15ms | 12 | 6 | 194 | 22 | 0.03 |
| 106 | 30s | 30 | 15 | 572.3 | 34.4 | | 0.03 | | 20mss | 18 | 8 | 273 | 31 | 0.04 |
| 107 | 25s | 25 | 11 | 434.0 | 26.1 | | 0.03 | | 20mss | 18 | 8 | 249 | 28 | 0.03 |
| 108 | 25s | 25 | 11 | 387.6 | 23.3 | | 0.04 | | 20ms | 16 | 5 | 172 | 19 | 0.03 |

Appendix Table 5: **Continued**

| GM. | Sinana | |  |  | |  | |  | | Agarfa | | | |  |
| --- | --- | --- | --- | --- | --- | --- | --- | --- | --- | --- | --- | --- | --- | --- |
| FRS | CI | ACI | AUDPC | rAUDPC | | r-value | | FRS | CI | ACI | AUDPC | rAUDPC | r-value |
| 109 | 30s | 30 | 19 | 694.1 | 41.7 | | 0.04 | | 30s | 30 | 9 | 280 | 32 | 0.04 |
| 110 | 30mss | 27 | 16 | 557.9 | 33.6 | | 0.04 | | 20mss | 18 | 8 | 263 | 30 | 0.02 |
| 111 | 40s | 40 | 29 | 1067.5 | 64.2 | | 0.03 | | 20mss | 18 | 11 | 326 | 37 | 0.03 |
| 112 | 40s | 40 | 24 | 843.3 | 50.7 | | 0.05 | | 20ms | 16 | 8 | 265 | 30 | 0.03 |
| 113 | 60s | 60 | 31 | 1086.8 | 65.4 | | 0.05 | | 40s | 40 | 20 | 674 | 76 | 0.04 |
| 114 | 50s | 50 | 23 | 818.3 | 49.2 | | 0.05 | | 25mss | 22.5 | 9 | 256 | 29 | 0.03 |
| 115 | 30s | 30 | 15 | 518.0 | 31.2 | | 0.03 | | 15mss | 13.5 | 8 | 265 | 30 | 0.02 |
| 116 | 30s | 30 | 13 | 464.8 | 55.9 | | 0.11 | | 30s | 30 | 12 | 386 | 44 | 0.17 |
| 117 | 40s | 40 | 23 | 813.8 | 48.9 | | 0.08 | | 20s | 20 | 12 | 404 | 46 | 0.03 |
| 118 | 70s | 70 | 44 | 1583.8 | 100.0 | | 0.10 | | 70s | 70 | 27 | 885 | 100 | 0.8 |
| 119 | 40s | 40 | 23 | 860.7 | 51.8 | | 0.05 | | 50s | 50 | 20 | 707 | 80 | 0.06 |
| 120 | 25ms | 20 | 15 | 551.3 | 33.2 | | 0.01 | | 20ms | 16 | 12 | 413 | 47 | 0.01 |
| 121 | 10mss | 9 | 6 | 213.5 | 12.8 | | 0.01 | | 15mss | 13.5 | 6 | 207 | 12 | 0.03 |

Appendix Table 6: FRS, ACI, AUDPC, AUDPC, r-value of the check or reference variety aong 121 advanced bread wheat genotypes and Commercial variety at sinana and Agarfa test locations

| GM. |  | Sinana | | |  | |  | | Agarfa | | | | | |  |
| --- | --- | --- | --- | --- | --- | --- | --- | --- | --- | --- | --- | --- | --- | --- | --- |
| FRS | | ACI | AUDPC | | rAUDPC | | r-value | | FRS |  | ACI | AUDPC | rAUDPC | | r-value |
| Hidasse | 70s | | 44 | 1583.8 | | 100.0 | | 0.17 | | 70s |  | **44** | 885 | 100 | | 0.10 |
| Digelu | 40s | | 23 | 860.7 | | 51.8 | | 0.05 | | 50s |  | **20** | 707 | 80 | | 0.06 |
| Dure | 25ms | | 15 | 551.3 | | 33.2 | | 0.01 | | 20ms |  | **12** | 413 | 47 | | 0.01 |
| **Mean** | **26.47** | | **14.55** | **515.42** | | **31.00** | | **-** | | **17.55** |  | **28.73** | **209.09** | **23.61** | |  |
| **CV** | **8.11** | | **10.07** | **11.22** | | **11.22** | | **-** | | **15.29** |  | **8.52** | **9.19** | **9.19** | |  |

*Hidasse and Digelu were used as susceptible check variety, **Dure were used as resistant check

Appendix Table 7: Coefficients of determination (R2), standard error(SE) for disease progress rate at sinana tested site

| Gen | Sinana | | R2 | R2 | SE | SE | Sinana |
| --- | --- | --- | --- | --- | --- | --- | --- |
| Logistic (DAP) | Gompertz | Logistic | Gompertz | Logistic | Gompertz | Selected model |
| 1 | - 8.473 + 0.09398 DAP | - 2.981 +0.03331 DAP | 79.2 | 83.1 | 0.629936 | 0.196469 | Gompertz |
| 2 | - 5.076 + 0.05087 DAP | - 2.074 + 0.02227 DAP | 84.9 | 88.5 | 0.280959 | 0.104995 | Gompertz |
| 3 | - 5.927 + 0.06594 DAP | - 2.396 + 0.02881 DAP | 37 | 48 | 1.12848 | 0.396999 | Gompertz |
| 4 | - 8.863 + 0.09779 DAP | - 3.165 + 0.03526 DAP | 88.5 | 91.8 | 0.460757 | 0.137616 | Gompertz |
| 5 | - 8.289 + 0.08728 DAP | - 2.867 + 0.02982 DAP | 85.9 | 90.8 | 0.462362 | 0.124256 | Gompertz |
| 6 | - 5.537 + 0.05767 DAP | - 2.288 + 0.02549 DAP | 95.60 | 98.6 | 0.18 | 0.045 | Gompertz |
| 7 | - 6.819 + 0.07198 DAP | - 2.709 + 0.02988 DAP | 96.3 | 96.4 | 0.184371 | 0.072582 | Gompertz |
| 8 | - 9.091 + 0.09905 DAP | - 3.229 + 0.03537 DAP | 94 | 95.8 | 0.328082 | 0.097327 | Gompertz |
| 9 | - 5.127 + 0.005322 DAP | - 1.639 + 0.001117 DAP | 54.9 | 54.8 | 0.063193 | 0.013274 | logistic |
| 10 | - 9.716 + 0.1130 DAP | - 3.472 + 0.04135DAP | 81.1 | 86.4 | 0.715154 | 0.215272 | Gompertz |
| 11 | - 7.696 + 0.09277 DAP | - 3.135 + 0.04055 DAP | 71.4 | 77.4 | 0.76897 | 0.289605 | Gompertz |
| 12 | - 12.10 + 0.1538 DAP | - 4.713 + 0.06372 DAP | 84.6 | 90.3 | 0.858832 | 0.273271 | Gompertz |
| 13 | - 10.33 + 0.1276 DAP | - 4.070 + 0.05304 DAP | 91.3 | 96.2 | 0.515805 | 0.138396 | Gompertz |
| 14 | - 10.11 + 0.1274 DAP | - 10.11 + 0.1274 DAP | 87.5 | 93.9 | 0.630693 | 0.181973 | Gompertz |
| 15 | - 5.295 + 0.05992 DAP | - 2.160 + 0.02695 DAP | 81.9 | 75.6 | 0.516805 | 0.13476 | logistic |
| 16 | - 8.227 + 0.09693 DAP | - 2.996 + 0.03668 DAP | 69 | 76.5 | 0.851076 | 0.266391 | Gompertz |
| 17 | - 8.648 + 0.07383 DAP | - 2.601 + 0.01965 DAP | 87.2 | 87.6 | 0.121963 | 0.13769 | Gompertz |
| 18 | - 5.490 + 0.06467 DAP | - 2.399 + 0.03125 DAP | 77 | 81.6 | 0.462803 | 0.194412 | Gompertz |
| 19 | - 8.811 + 0.1078 DAP | - 3.421 + 0.04430 DAP | 78 | 86.2 | 0.749923 | 0.23203 | Gompertz |
| 20 | L20 = - 8.659 + 0.09772 | - 3.120 + 0.03583 DAP | 83.7 | 89.1 | 0.565458 | 0.16449 | Gompertz |
| 21 | - 7.517 + 0.07726 DAP | -2.552 + 0.02566 DAP | 68.5 | 69.8 | 0.68655 | 0.220836 | Gompertz |
| 22 | - 9.126 + 0.1129 DAP | - 9.126 + 0.1129 DAP | 77.3 | 77.3 | 0.8024 | 0.8 | Gompertz |

Continued Appendix Table 7

| Gen | Sinana | | R2 | R2 | SE | SE | Sinana |
| --- | --- | --- | --- | --- | --- | --- | --- |
| Logistic (DAP) | Gompertz | Logistic | Gompertz | Logistic | Gompertz | Selected model |
| 23 | - 7.120 + 0.08420 DAP | - 3.032 + 0.03862 DAP | 86.1 | 89.3 | 0.442489 | 0.174713 | Gompertz |
| 24 | - 7.225 + 0.09252 DAP | - 3.354 + 0.04728 DAP | 87.8 | 90.2 | 0.4509 | 0.20419 | Gompertz |
| 25 | - 5.579 + 0.06581 DAP | - 2.526 + 0.03303 DAP | 85.9 | 88.8 | 0.348594 | 0.153575 | Gompertz |
| 26 | - 9.895 + 0.1044 DAP | - 3.138 + 0.03186 DAP | 77.6 | 74.6 | 0.243521 | 0.243521 | logistic |
| 27 | - 9.154 + 0.09122 DAP | 2.849 - 0.02664 DAP | 70.5 | 66.8 | 0.7724 | 0.24597 | Gompertz |
| 28 | - 9.316 + 0.1091 DAP | - 3.396 + 0.04094 DAP | 84 | 88 | 0.624068 | 0.1879 | Gompertz |
| 29 | - 0.001009 + 0.000024 DAP | - 2.552 + 0.02126 DAP | 67.9 | 67.8 | 0.00021 | 0.191707 | logistic |
| 30 | - 10.47 + 0.1147 DAP | - 3.462 + 0.03768 DAP | 75 | 75.3 | 0.8671 | 0.2822 | Gompertz |
| 31 | - 4.605 + 0.03543 DAP | - 1.722 + 0.01325 DAP | 74.2 | 75.2 | 0.273852 | 0.099566 | Gompertz |
| 32 | - 5.968 + 0.05739 DAP | - 2.293 + 0.02268 DAP | 84.6 | 85 | 0.320102 | 0.12488 | Gompertz |
| 33 | - 8.206 + 0.09479 DAP | - 3.014 + 0.03595 DAP | 75 | 83.1 | 0.716292 | 0.212595 | Gompertz |
| 34 | - 5.323 + 0.05027 DAP | - 2.051 + 0.02006 DAP | 73.9 | 74.3 | 0.391073 | 0.15461 | Gompertz |
| 35 | - 10.25 + 0.1042 DAP | - 3.218 + 0.03126 DAP | 80.2 | 81.4 | 0.678253 | 0.1955 | Gompertz |
| 36 | - 11.98 + 0.1502 DAP | - 4.529 + 0.05998 DAP | 83.6 | 88.1 | 0.862583 | 0.288771 | Gompertz |
| 37 | - 10.27 + 0.1244 DAP | - 4.023 + 0.05127 DAP | 92.1 | 94.4 | 0.476409 | 0.163453 | Gompertz |
| 38 | - 9.964 + 0.1144 DAP | - 3.560 + 0.04170 DAP | 86.2 | 89.6 | 0.60055 | 0.186166 | Gompertz |
| 39 | - 10.51 + 0.1169 DAP | - 3.507 + 0.03881 DAP | 84.7 | 84.4 | 0.650396 | 0.21865 | logistic |
| 40 | - 11.47 + 0.1346 DAP | - 4.013 + 0.04816 DAP | 86.7 | 86.6 | 0.689727 | 0.24788 | logistic/R2 |
| 41 | - 9.497 + 0.08762 DAP | - 2.879 + 0.02427 DAP | 86.2 | 85.5 | 0.459992 | 0.130969 | Logistic |
| 42 | - 9.543 + 0.09620 DAP | - 2.942 + 0.02797 DAP | 64.8 | 62.2 | 0.927884 | 0.285779 | Logistic |
| 43 | - 8.494 + 0.08566 DAP | - 2.782 + 0.02693 DAP | 76.2 | 74.9 | 0.627323 | 0.203873 | Logistic |
| 44 | - 0.0251 + 2.855 G44 | - 3.084 + 0.03460 DAP | 97.5 | 92.3 | 0.216252 | 0.130712 | Logistic |

Continued Appendix Table 7

| Gen | Sinana | | R2 | R2 | SE | SE | Sinana |
| --- | --- | --- | --- | --- | --- | --- | --- |
| Logistic (DAP) | Gompertz | Logistic | Gompertz | Logistic | Gompertz | Selected model |
| 45 | - 8.107 + 0.06252 DAP | - 2.394 + 0.01559 DAP | 76.6 | 76 | 0.453 | 0.115 | Logistic |
| 46 | - 9.015 + 0.07803 DAP | - 2.690 + 0.02066 DAP | 84.7 | 85.7 | 0.453 | 0.115 | Gompertz |
| 47 | - 7.652 + 0.05430 DAP | - 2.288 + 0.01360 DAP | 70 | 69.4 | 0.466 | 0.118 | Logistic |
| 48 | - 8.463 + 0.07658 DAP | - 2.615 + 0.02141 DAP | 85.7 | 87.5 | 0.410 | 0.106 | Gompertz |
| 49 | - 5.121 + 0.04067 DAP | - 1.912 + 0.01520 DAP | 78.2 | 77.4 | 0.281 | 0.107 | Logistic |
| 50 | - 7.512 + 0.05052 DAP | - 2.228 + 0.01229 DAP | 61.1 | 58.3 | 0.528 | 0.136 | Logistic |
| 51 | - 0.001087 + 0.000040 DAP | 3.907 - 0.03288 DAP | 80.5 | 81.6 | 0.000 | 0.205 | Gompertz/R2 |
| 52 | - 10.33 + 0.1144 DAP | - 3.484 + 0.03843 DAP | 88 | 89 | 0.554 | 0.177 | Gompertz |
| 53 | - 9.427 + 0.1083 DAP | - 3.461 + 0.04077 DAP | 90.7 | 95.1 | 0.453 | 0.121 | Gompertz |
| 54 | - 9.321 + 0.1075 DAP | - 3.378 + 0.03989 DAP | 86.4 | 89.8 | 0.558 | 0.176 | Gompertz |
| 55 | - 7.243 + 0.08844 DAP | - 2.981 + 0.03929 DAP | 72.6 | 83.5 | 0.711 | 0.229 | Gompertz |
| 56 | - 9.615 + 0.1110 DAP | - 3.486 + 0.04116 DAP | 90.2 | 95.6 | 0.480 | 0.116 | Gompertz |
| 57 | - 5.740 + 0.05989 DAP | - 2.317 + 0.02572 DAP | 75.9 | 74 | 0.442 | 0.199 | Logistic |
| 58 | - 7.275 + 0.07846 DAP | - 2.720 + 0.03008 DAP | 79.9 | 87.4 | 0.515 | 0.149 | Gompertz |
| 59 | - 6.120 + 0.07092 DAP | - 2.671 + 0.03371 DAP | 89.4 | 93.5 | 0.320 | 0.117 | Gompertz |
| 60 | - 7.981 + 0.09318 DAP | - 3.152 + 0.03878 DAP | 79.6 | 88.5 | 0.618 | 0.183 | Gompertz |
| 61 | - 5.849 + 0.06104 DAP | - 2.394 + 0.02656 DAP | 92.3 | 93.4 | 0.231 | 0.092 | Gompertz |
| 62 | - 9.597 + 0.08980 DAP | - 2.922 + 0.02514 DAP | 85.9?? | 85.9 | 0.476 | 0.133 | Gompertz/SE |
| 63 | - 7.307 + 0.04471 DAP | - 2.235 + 0.01176 DAP | 51.5 | 50 | 0.569 | 0.157 | Logistic/R2 |
| 64 | - 8.811 + 0.09619 DAP | - 3.129 + 0.03438 DAP | 88.1 | 91.3 | 0.464 | 0.139 | Gompertz |
| 65 | - 6.933 + 0.03643 DAP | - 2.074 + 0.008622 DAP | 62.3 | 59.3 | 0.371 | 0.093 | Logistic |
| 66 | - 8.622 + 0.09334 DAP | - 2.948 + 0.03160 DAP | 81.3 | 86.9 | 0.582 | 0.161 | Gompertz |

Continued Appendix Table 7

| 67 | - 8.115 + 0.06204 DAP | - 2.486 + 0.01687 DAP | 71.3 | 71 | 0.515 | 0.141 | Loguistic/R2 |
| --- | --- | --- | --- | --- | --- | --- | --- |
| 68 | - 6.233 + 0.06674 DAP | - 2.526 + 0.02867 DAP | 84.1 | 83.4 | 0.381 | 0.167 | logistic/R2 |
| 69 | - 7.828 + 0.05973 DAP | - 2.346 + 0.01519 DAP | 79.4 | 78.6 | 0.398 | 0.104 | logistic/R2 |
| 70 | - 4.956 + 0.03607 DAP | - 8.942 + 0.08835 DAP | 77.6 | 86.2 | 0.254 | 0.093 | Gompertz |
| 71 | - 8.942 + 0.08835 DAP | - 2.852 + 0.02656 DAP | 86.2 | 88.1 | 0.462 | 0.128 | Gompertz |
| 72 | - 5.121 + 0.04067 DAP | - 1.912 + 0.01520 DAP | 78.2 | 77.4 | 0.281 | 0.107 | Logistc/R2 |
| 73 | - 0.001698 + 0.000041 DAP | 5.474 - 0.04719 DAP | 76.9 | 79.8 | 0 | 0.311 | Gompertz/R2 |
| 74 | - 5.702 + 0.05959 DAP | - 2.306 + 0.02559 DAP | 84.1 | 83.8 | 0.339 | 0.147 | Logistc |
| 75 | - 5.060 + 0.03956 DAP | - 1.896 + 0.01492 DAP | 69.2 | 66.3 | 0.346 | 0.139 | Logistc |
| 76 | - 10.09 + 0.1127 DAP | - 3.416 + 0.03811 DAP | 84.5 | 88 | 0.632 | 0.184 | Gompertz |
| 77 | - 8.160 + 0.06701 DAP | - 2.490 + 0.01807 DAP | 75.9 | 74.4 | 0.494 | 0.122 | Logisti/R2 |
| 78 | - 5.737 + 0.04486 DAP | - 1.971 + 0.01436 DAP | 63.6 | 70.3 | 0.445 | 0.012 | Gompertz |
| 79 | - 6.151 + 0.07130 DAP | - 2.707 + 0.03422 DAP | 91 | 93.7 | 0.058 | 0.235 | Gompertz |
| 80 | - 6.683 + 0.07454 DAP | - 2.606 + 0.03062 DAP | 67.3 | 74.4 | 0.68 | 0.243 | Gompertz |
| 81 | - 10.87 + 0.1274 DAP | - 3.749 + 0.04471 DAP | 82.4 | 85.3 | 0.77 |  | Gompertz |
| 82 | - 5.147 + 0.04677 DAP | - 1.998 + 0.01880 DAP | 84.8 | 85.7 | 0.259 | 0.101 | Gompertz |
| 83 | - 5.127 + 0.005322 DAP | - 1.639 + 0.001117 DAP | 54.9 | 54.8 | 0.414 | 0.063 | Logistic/R2 |
| 84 | - 6.846 + 0.03627 DAP | - 2.072 + 0.008854 DAP | 57.7 | 55.5 | 0.406 | 0.104 | Logistic/R2 |
| 85 | - 9.817 + 0.1211 DAP | - 3.820 + 0.04975 DAP | 85.8 | 90.1 | 0.645 | 0.216 | Gompertz |
| 86 | - 9.849 + 0.1013 DAP | - 3.194 + 0.03177 DAP | 86.2 | 88.6 | 0.531 | 0.149 | Gompertz |
| 87 | - 10.21 + 0.1106 DAP | - 3.296 + 0.03479 DAP | 83.6 | 86.3 | 0.642 | 0.182 | Gompertz |
| 88 | - 5.884 + 0.06294 DAP | - 2.411 + 0.02750 DAP | 88.3 | 89.2 | 0.3 | 0.125 | Gompertz |
| 89 | - 12.32 + 0.1489 DAP | - 4.483 + 0.05627 DAP | 91.6 | 92.5 | 0.59 | 0.21 | Gompertz |
| 90 | - 7.592 + 0.09032 DAP | - 3.274 + 0.04195 DAP | 90.1 | 90.6 | 0.39 | 0.18 | Gompertz |
| 91 | - 8.538 + 0.1099 DAP | - 3.713 + 0.05195 DAP | 81.9 | 89.3 | 0.68 | 0.24 | Gompertz |

Continued Appendix Table 7

| Gen | Sinana(COEFFICINT ) | | R2 | R2 | SE | SE | Sinana |
| --- | --- | --- | --- | --- | --- | --- | --- |
| Logistic (DAP) | Gompertz | Logistic | Gompertz | Logistic | Gompertz | Selected model |
| 92 | - 6.359 + 0.07417 DAP | - 2.790 + 0.03547 DAP | 85.6 | 86.2 | 0.40 | 0.19 | Gompertz |
| 93 | - 6.364 + 0.07583 DAP | - 2.814 + 0.03662 DAP | 90.2 | 92.9 | 0.33 | 0.13 | Gompertz |
| 94 | - 6.172 + 0.07434 DAP | - 2.741 + 0.03627 DAP | 84.7 | 87 | 0.41 | 0.18 | Gompertz |
| 95 | - 0.003776 + 0.000087 DAP | 6.514 - 0.07306 DAP | 84.3 | 80.5 | 0.00 | 0.47 | logistic |
| 96 | - 4.912 + 0.04772 DAP | - 1.955 + 0.02014 DAP | 77.3 | 78.3 | 0.34 | 0.14 | Gompertz |
| 97 | - 6.172 + 0.07434 DAP | - 3.071 + 0.03525 DAP | 84.7 | 82.5 | 0.43 | 0.21 | logistic |
| 98 | - 9.001 + 0.07988 DAP | - 2.737 + 0.02194 DAP | 85.8 | 86.2 | 0.43 | 0.11 | Gompertz |
| 99 | - 9.650 + 0.09930 DAP | - 3.056 + 0.02992 DAP | 86.9 | 89.3 | 0.51 | 0.14 | Gompertz |
| 100 | - 7.861 + 0.05639 DAP | - 2.355 + 0.01435 DAP | 76.6 | 75.7 | 0.41 | 0.11 | logistic/R2 |
| 101 | - 9.174 + 0.1048 DAP | - 3.334 + 0.03892 DAP | 88.6 | 93.1 | 0.49 | 0.13 | Gompertz |
| 102 | - 10.39 + 0.1282 DAP | - 4.030 + 0.05238 DAP | 88.5 | 92.1 | 0.61 | 0.20 | Gompertz |
| 103 | - 8.165 + 0.08046 DAP | - 2.690 + 0.02523 DAP | 86.4 | 92.2 | 0.42 | 0.10 | Gompertz |
| 104 | - 6.027 + 0.05450 DAP | - 2.256 + 0.02060 DAP | 86.3 | 83.7 | 0.28 | 0.12 | logistic |
| 105 | - 9.564 + 0.09352 DAP | - 2.999 + 0.02765 DAP | 79.7 | 80.5 | 0.62 | 0.18 | Gompertz |
| 106 | - 6.788 + 0.07354 DAP | - 2.747 + 0.03141 DAP | 88.9 | 87.9 | 0.34 | 0.15 | Logistic |
| 107 | - 8.454 + 0.09153 DAP | - 2.976 + 0.03223 DAP | 86.9 | 92.3 | 0.47 | 0.12 | Gomperzt |
| 108 | - 10.88 + 0.1217 DAP | - 3.621 + 0.04029 DAP | 89.5 | 91.4 | 0.55 | 0.16 | Gomperzt |
| 109 | - 9.407 + 0.1120 DAP | - 3.441 + 0.04242 DAP | 80.7 | 86.5 | 0.72 | 0.22 | Gomperzt |
| 110 | - 9.168 + 0.1053 DAP | - 3.326 + 0.03907 DAP | 86.9 | 92.4 | 0.54 | 0.15 | Gomperzt |

Continued Appendix Table 7

| Gen | Sinana | | R2 | R2 | SE | SE | Sinana |
| --- | --- | --- | --- | --- | --- | --- | --- |
| Logistic (DAP) | Gompertz | Logistic | Gompertz | Logistic | Gompertz | Selected model |
| 111 | - 5.551 + 0.06730 DAP | - 2.441 + 0.03292 DAP | 74.2 | 78.5 | 0.52 | 0.23 | Gomperzt |
| 112 | - 9.768 + 0.1208 DAP | - 3.785 + 0.04943 DAP | 84 | 89.2 | 0.69 | 0.22 | Gomperzt |
| 113 | - 8.002 + 0.1036 DAP | - 3.697 + 0.05245 DAP | 81.7 | 93.7 | 0.64 | 0.18 | Gomperzt |
| 114 | - 9.479 + 0.1165 DAP | - 3.800 + 0.04970 DAP | 76.7 | 87.3 | 0.84 |  | Gomperzt |
| 115 | - 6.010 + 0.06149 DAP | - 2.410 + 0.02594 DAP | 91.9 | 93.2 | 0.24 | 0.09 | Gomperzt |
| 116 | - 10.15 + 0.1138 DAP | - 3.353 + 0.03735 DAP | 77.7 | 77.1 | 0.80 | 0.27 | Logistic |
| 117 | - 0.005267 + 0.000114 DAP | 6.531 - 0.07694 DAP | 96.7 | 96 | 0.00 | 0.21 | Logistic |
| 118 | - 6.253 + 0.08829 DAP | - 3.340 + 0.05330 DAP | 84.8 | 92 | 0.49 | 0.21 | Gompertz |
| 119 | - 9.796 + 0.1214 DAP | - 3.771 + 0.04938 DAP | 82.4 | 88.2 | 0.74 | 0.24 | Gompertz |
| 120 | - 4.198 + 0.03600 DAP | - 1.627 + 0.01463 DAP | 66.1 | 70.1 | 0.34 | 0.12 | Gompertz |
| 121 | - 5.448 + 0.03875 DAP | - 1.846 + 0.01182 DAP | 60.4 | 67.3 | 0.41 | 0.11 | Gompertz |

Appendix Table 8 : Coefficients of determination (R2), standard error(SE) for disease progress rate at Agarfa tested site

| Gen | Agarfa | | R2 | R2 | SE | SE |  |
| --- | --- | --- | --- | --- | --- | --- | --- |
| Logistic | Gompertz | Logistic | Gompertz | Logistic | Gompertz | Selected model |
| 1 | - 8.381 + 0.07059 DAP | - 2.578 + 0.01945 DAP | 84.2 | 85.6 | 0.401 | 0.104 | Gompertz |
| 2 | - 5.162 + 0.03663 DAP | - 1.891 + 0.01319 DAP | 70.7 | 69.3 | 0.309 | 0.115 | Logistic |
| 3 | - 8.219 + 0.07070 DAP | - 2.535 + 0.01952 DAP | 83.3 | 85.5 | 0.414 | 0.105 | Gompertz |
| 4 | - 8.234 + 0.05890 DAP | - 2.434 + 0.01481 DAP | 75.8 | 74.6 | 0.436 | 0.113 | Logistic |
| 5 | - 9.999 + 0.09099 DAP | - 3.056 + 0.02590 DAP | 78.1 | 78.8 | 0.631 | 0.176 | Gompertz |
| 6 | - 7.990 + 0.06297 DAP | - 2.408 + 0.01639 DAP | 75.9 | 76.5 | 0.465 | 0.119 | Gompertz |
| 7 | - 8.357 + 0.06276 DAP | - 2.466 + 0.01582 DAP | 71.9 | 71.3 | 0.514 | 0.131 | Logistic |
| 8 | - 8.458 + 0.06652 DAP | - 2.498 + 0.01685 DAP | 81 | 80.8 | 0.422 | 0.107 | Gompertz |
| 9 | - 5.032 + 0.003510 DAP | - 1.619 + 0.000735 DAP | 38.4 | 38.3 | 0.058 | 0.012 | Logistic |
| 10 | - 5.570 + 0.04388 DAP | - 2.112 + 0.01701 DAP | 63.3 | 64.8 | 0.438 | 0.164 | Gompertz |
| 11 | - 10.47 + 0.1026 DAP | - 3.340 + 0.03158 DAP | 81.2 | 82.9 | 0.646 | 0.188 | Gompertz |
| 12 | - 12.57 + 0.1429 DAP | - 4.498 + 0.05282 DAP | 85.4 | 87.6 | 0.774 | 0.260 | Gompertz |
| 13 | - 12.71 + 0.1423 DAP | - 4.637 + 0.05398 DAP | 86.2 | 83 | 0.745 | 0.320 | Logistic |
| 14 | - 0.006106 + 0.000112 DAP | - 4.189 + 0.04941 DAP | 91.6 | 95.6 | 0.000 | 0.139 | Gompertz |
| 15 | - 11.21 + 0.1108 DAP | - 3.679 + 0.03633 DAP | 66.7 | 67.8 | 1.026 | 0.328 | Gompertz |
| 16 | 4.244 - 0.04952 DAP | - 11.96 + 0.1364 DAP | 94.4 | 93.7 | 0.462 | 0.158 | Logistic |
| 17 | - 21.77 + 0.2127 DAP | - 5.540 + 0.04983 DAP | 98.1 | 98.6 | 0.145 | 0.029 | Gompertz |
| 18 | - 11.38 + 0.1240 DAP | - 3.869 + 0.04225 DAP | 94.6 | 93.9 | 0.389 | 0.141 | Logistic |
| 19 | - 11.76 + 0.1275 DAP | - 4.033 + 0.04424 DAP | 87 | 85.5 | 0.645 | 0.238 | Logistic |
| 20 | - 11.06 + 0.1113 DAP | - 3.515 + 0.03430 DAP | 86.7 | 86 | 0.571 | 0.181 | Logistic |
| 21 | - 5.457 + 0.04149 DAP | - 2.017 + 0.01528 DAP | 73.4 | 72.6 | 0.327 | 0.123 | Logistic |
| 22 | - 11.59 + 0.1239 DAP | - 3.934 + 0.04222 DAP | 91.3 | 89.1 | 0.501 | 0.194 | Logistic |

Continued Appendix Table 8

| Gen | Agarfa | | R2 | R2 | SE | SE |  |
| --- | --- | --- | --- | --- | --- | --- | --- |
| Logistic | Gompertz | Logistic | Gompertz | Logistic | Gompertz | Selected model |
| 23 | - 5.725 + 0.04542 DAP | - 2.149 + 0.01728 DAP | 68.6 | 68.8 | 0.402 | 0.152 | Gompertz |
| 24 | - 9.639 + 0.09441 DAP | - 3.159 + 0.03004 DAP | 77 | 80.1 | 0.676 | 0.196 | Gompertz |
| 25 | - 4.954 + 0.03622 DAP | - 1.832 + 0.01323 DAP | 79.6 | 79 | 0.240 | 0.089 | Gompertz |
| 26 | - 11.33 + 0.1165 DAP | - 3.603 + 0.03604 DAP | 86 | 87.6 | 0.614 | 0.177 | Gompertz |
| 27 | - 7.234 + 0.06545 DAP | - 2.385 + 0.02019 DAP | 76.2 | 82.2 | 0.480 | 0.123 | Gompertz |
| 28 | - 10.08 + 0.09174 DAP | - 3.148 + 0.02728 DAP | 70.8 | 70.7 | 0.771 | 0.230 | Gompertz |
| 29 | - 13.45 + 0.1245 DAP | - 3.808 + 0.03208 DAP | 81.4 | 82.4 | 0.417 | 0.104 | Gompertz |
| 30 | - 8.396 + 0.06115 DAP | - 2.490 + 0.01565 DAP | 68.4 | 67.7 | 0.544 | 0.141 | Logistic |
| 31 | - 5.999 + 0.04071 DAP | - 1.921 + 0.01103 DAP | 58.9 | 62 | 0.445 | 0.113 | Gompertz |
| 32 | - 6.040 + 0.04564 DAP | - 2.055 + 0.01437 DAP | 71.4 | 77.2 | 0.378 | 0.102 | Gompertz |
| 33 | - 7.204 + 0.06090 DAP | - 2.333 + 0.01800 DAP | 77.8 | 83.6 | 0.426 | 0.104 | Gompertz |
| 34 | - 9.912 + 0.09949 DAP | - 3.155 + 0.03025 DAP | 89.7 | 90.6 | 0.442 | 0.128 | Gompertz |
| 35 | - 1.927 + 0.006335 DAP | - 9.165 + 0.08515 DAP | 50 | 50 | 0.000 | 0.085 | Logistic |
| 36 | - 9.165 + 0.08515 DAP | - 2.945 + 0.02602 DAP | 76.6 | 78.7 | 0.616 | 0.177 | Gompertz |
| 37 | 2.725 - 0.02013 DAP | - 9.006 + 0.07379 DAP | 74.7 | 73.6 | 0.562 | 0.158 | Logistic |
| 38 | - 9.244 + 0.07600 DAP | - 2.783 + 0.02071 DAP | 71.7 | 71.9 | 0.625 | 0.170 | Gompertz |
| 39 | - 9.551 + 0.09227 DAP | - 3.036 + 0.02776 DAP | 91.1 | 91.9 | 0.377 | 0.108 | Gompertz |
| 40 | - 9.268 + 0.08160 DAP | - 2.838 + 0.02286 DAP | 85.2 | 85.7 | 0.445 | 0.122 | Gompertz |
| 41 | - 5.901 + 0.02164 DAP | - 1.848 + 0.005319 DAP | 37.3 | 36.7 | 0.364 | 0.091 | Logistic |
| 42 | - 18.54 + 0.1939 DAP | - 5.645 + 0.05709 DAP | 95.9 | 97.9 | 0.280 | 0.058 | Gompertz |
| 43 | - 9.891 + 0.09248 DAP | - 3.062 + 0.02678 DAP | 87.9 | 87.4 | 0.449 | 0.133 | Gompertz |
| 44 | - 6.840 + 0.04258 DAP | - 2.221 + 0.01223 DAP | 100 | 100 | 0.000 | 0.000 | both |

Continued Appendix Table 8

| Gen | Agarfa | | R2 | R2 | SE | SE |  |
| --- | --- | --- | --- | --- | --- | --- | --- |
| Logistic | Gompertz | Logistic | Gompertz | Logistic | Gompertz | Selected model |
| 45 | - 6.739 + 0.03193 DAP | - 2.038 + 0.007704 DAP | 47.7 | 46.7 | 0.438 | 0.108 | Gompertz |
| 46 | - 9.200 + 0.07656 DAP | - 2.822 + 0.02163 DAP | 69.5 | 69 | 0.664 | 0.190 | Logistic |
| 47 | - 6.019 + 0.03992 DAP | - 1.908 + 0.01054 DAP | 53 | 55.1 | 0.492 | 0.125 | Gompertz |
| 48 | - 7.123 + 0.03965 DAP | - 2.116 + 0.009328 DAP | 63.7 | 62.9 | 0.392 | 0.094 | Logistic |
| 49 | - 4.403 + 0.02381 DAP | - 1.585 + 0.008020 DAP | 71.5 | 71.9 | 0.197 | 0.066 | Gompertz |
| 50 | - 10.77 + 0.1086 DAP | - 3.987 + 0.04024 DAP | 79.3 | 80.1 | 0.388 | 0.141 | Gompertz |
| 51 | - 9.423 + 0.08277 DAP | - 2.902 + 0.02358 DAP | 79 | 78.3 | 0.560 | 0.162 | Logistic |
| 52 | - 9.787 + 0.08741 DAP | - 3.040 + 0.02559 DAP | 70.4 | 70.2 | 0.742 | 0.218 | Gompertz |
| 53 | - 9.327 + 0.08237 DAP | - 2.906 + 0.02392 DAP | 78.2 | 78.7 | 0.569 | 0.163 | Gompertz |
| 54 | - 5.749 + 0.04703 DAP | - 2.130 + 0.01742 DAP | 81.6 | 82.1 | 0.292 | 0.107 | Gompertz |
| 55 | - 10.28 + 0.1054 DAP | - 3.272 + 0.03227 DAP | 89.2 | 91.6 | 0.481 | 0.128 | Gompertz |
| 56 | - 11.98 + 0.1297 DAP | - 4.031 + 0.04392 DAP | 86.2 | 87.4 | 0.679 | 0.218 | Logistic |
| 57 | - 0.000882 + 0.000017 DAP | - 2.555 + 0.01801 DAP | 83.5 | 82.9 | 0.000 | 0.107 | Logistic |
| 58 | - 8.802 + 0.07754 DAP | - 2.720 + 0.02185 DAP | 83.2 | 85.4 | 0.457 | 0.118 | Logistic |
| 59 | 2.733 - 0.02540 DAP | - 8.103 + 0.07810 DAP | 88.6 | 92.8 | 0.366 | 0.093 | Gompertz |
| 60 | - 9.417 + 0.08600 DAP | - 2.927 + 0.02486 DAP | 84.8 | 79.6 | 0.477 | 0.140 | Logistic |
| 61 | - 13.35 + 0.1294 DAP | - 3.932 + 0.03567 DAP | 79.6 | 79.8 | 0.592 | 0.162 | Gompertz |
| 62 | - 8.552 + 0.06941 DAP | - 2.560 + 0.01818 DAP | 81.3 | 82.2 | 0.436 | 0.111 | Gompertz |
| 63 | - 11.40 + 0.09943 DAP | - 3.280 + 0.02563 DAP | 86.6 | 87.3 | 0.353 | 0.088 | Gompertz |
| 64 | - 10.74 + 0.1082 DAP | - 3.421 + 0.03331 DAP | 84.8 | 86.4 | 0.600 | 0.173 | Gompertz |
| 65 | - 6.725 + 0.03654 DAP | - 2.046 + 0.008899 DAP | 68.5 | 68.6 | 0.324 | 0.079 | Gompertz |
| 66 | - 9.727 + 0.08903 DAP | - 2.978 + 0.02521 DAP | 84.5 | 85.9 | 0.499 | 0.134 | Gompertz |
| 67 | - 8.055 + 0.06054 DAP | - 2.404 + 0.01540 DAP | 79.4 | 79.9 | 0.404 | 0.101 | Gompertz |

Continued Appendix Table 8

| Gen | Agarfa | | R2 | R2 | SE | SE |  |
| --- | --- | --- | --- | --- | --- | --- | --- |
| Logistic | Gompertz | Logistic | Gompertz | Logistic | Gompertz | Selected model |
| 68 | - 6.559 + 0.04946 DAP | - 2.089 + 0.01373 DAP | 66.3 | 70.5 | 0.462 | 0.116 | Gompertz |
| 69 | - 6.593 + 0.03209 DAP | - 2.022 + 0.007977 DAP | 49 | 51 | 0.430 | 0.109 | Gompertz |
| 70 | - 8.460 + 0.07190 DAP | - 2.607 + 0.01993 DAP | 84.8 | 86.2 | 0.398 | 0.104 | Gompertz |
| 71 | - 5.939 + 0.03950 DAP | - 1.912 + 0.01083 DAP | 51.2 | 51.6 | 0.505 | 0.137 | Gompertz |
| 72 | - 8.335 + 0.06970 DAP | - 2.556 + 0.01905 DAP | 83.9 | 84.9 | 0.400 | 0.105 | Gompertz |
| 73 | - 7.967 + 0.06319 DAP | - 2.411 + 0.01657 DAP | 78.1 | 78.8 | 0.438 | 0.112 | Logistic |
| 74 | - 7.541 + 0.06116 DAP | - 2.326 + 0.01657 DAP | 63.8 | 61.1 | 0.604 | 0.173 | Logistic |
| 75 | - 6.489 + 0.04959 DAP | - 2.099 + 0.01423 DAP | 67 | 70.8 | 0.455 | 0.120 | Gompertz |
| 76 | - 10.01 + 0.09461 DAP | - 3.096 + 0.02745 DAP | 85.5 | 86..3 | 0.510 | 0.143 | Gompertz |
| 77 | - 6.550 + 0.04909 DAP | - 2.088 + 0.01364 DAP | 66.6 | 71.3 | 0.455 | 0.113 | Gompertz |
| 78 | - 6.115 + 0.04811 DAP | - 2.106 + 0.01561 DAP | 67.3 | 72.6 | 0.439 | 0.126 | Gompertz |
| 79 | - 0.000000 + 0.000001 DAP | - 1.862 + 0.002802 DAP | 77.1 | 77.1 | 0.000 | 0.020 | Logistic |
| 80 | - 9.149 + 0.07656 DAP | - 2.798 + 0.02140 DAP | 78.2 | 76.3 | 0.529 | 0.156 | Logistic |
| 81 | - 12.79 + 0.1418 DAP | - 4.533 + 0.05186 DAP | 85.6 | 83.1 | 0.761 | 0.306 | Logistic |
| 82 | - 9.103 + 0.08697 DAP | - 2.859 + 0.02549 DAP | 86.5 | 88.4 | 0.451 | 0.121 | Gompertz |
| 83 | - 11.89 + 0.1076 DAP | - 3.445 + 0.02833 DAP | 84.1 | 84.1 | 0.422 | 0.111 | Gompertz |
| 84 | - 7.179 + 0.04062 DAP | - 2.134 + 0.009623 DAP | 68.2 | 68.2 | 0.363 | 0.086 | Gompertz |
| 85 | - 6.860 + 0.03815 DAP | - 2.104 + 0.009711 DAP | 55.2 | 55.1 | 0.450 | 0.115 | Logistic |
| 86 | - 10.86 + 0.1083 DAP | - 3.457 + 0.03341 DAP | 83 | 82.6 | 0.642 | 0.201 | Logistic |
| 87 | - 13.07 + 0.1284 DAP | - 4.292 + 0.04080 DAP | 90.6 | 90.6 | 0.290 | 0.092 | Gompertz |
| 88 | - 10.30 + 0.1094 DAP | - 3.431 + 0.03595 DAP | 89.4 | 91.1 | 0.439 | 0.147 | Gompertz |
| 89 | - 10.82 + 0.1089 DAP | - 3.605 + 0.03598 DAP | 87 | 82 | 0.552 | 0.221 | Logistic |
| 90 | - 6.869 + 0.06959 DAP | - 2.771 + 0.02953 DAP | 87.8 | 88 | 0.340 | 0.143 | Gompertz |

Continued Appendix Table 8

| Gen | Agarfa | | R2 | R2 | SE | SE |  |
| --- | --- | --- | --- | --- | --- | --- | --- |
| Logistic | Gompertz | Logistic | Gompertz | Logistic | Gompertz | Selected model |
| 91 | - 7.620 + 0.07653 DAP | - 2.978 + 0.03121 DAP | 76.7 | 75.1 | 0.552 | 0.236 | Logistic |
| 92 | - 8.297 + 0.08097 DAP | - 2.781 + 0.02616 DAP | 87.7 | 92.8 | 0.396 | 0.095 | Gompertz |
| 93 | - 10.57 + 0.09992 DAP | - 3.378 + 0.03112 DAP | 70.3 | 70.9 | 0.852 | 0.261 | Gompertz |
| 94 | - 7.205 + 0.07316 DAP | - 2.882 + 0.03071 DAP | 84.4 | 82.5 | 0.411 | 0.185 | Logistic |
| 95 | - 4.985 + 0.03303 DAP | - 1.827 + 0.01188 DAP | 72.1 | 69.6 | 0.269 | 0.103 | Logistic |
| 96 | - 4.988 + 0.03365 DAP | - 1.820 + 0.01195 DAP | 75.6 | 75.1 | 0.250 | 0.090 | Logistic |
| 97 | - 9.441 + 0.09932 DAP | - 3.372 + 0.03584 DAP | 86.8 | 85.8 | 0.508 | 0.191 | Logistic |
| 98 | - 7.505 + 0.04941 DAP | - 2.293 + 0.01298 DAP | 64.9 | 62.6 | 0.475 | 0.131 | Logistic |
| 99 | - 10.08 + 0.09655 DAP | - 3.163 + 0.02871 DAP | 88.7 | 88.6 | 0.450 | 0.135 | Gompertz |
| 100 | - 13.39 + 0.09960 DAP | - 3.223 + 0.01916 DAP | 100 | 100 | 0.000 | 0.000 | both |
| 101 | - 0.002258 + 0.000040 DAP | - 3.162 + 0.02762 DAP | 69.3 | 68.9 | 0.000 | 0.243 | Logistic |
| 102 | - 12.13 + 0.1300 DAP | - 4.072 + 0.04392 DAP | 86.9 | 84.6 | 0.661 | 0.246 | Gompertz |
| 103 | - 15.26 + 0.1478 DAP | - 4.307 + 0.03858 DAP | 89.7 | 92.3 | 0.351 | 0.078 | Gompertz |
| 104 | - 9.266 + 0.07689 DAP | - 2.791 + 0.02100 DAP | 69.5 | 69.3 | 0.667 | 0.183 | Logistic |
| 105 | - 9.561 + 0.09156 DAP | - 2.970 + 0.02651 DAP | 90 | 92.3 | 0.401 | 0.100 | Gompertz |
| 106 | - 11.35 + 0.1179 DAP | - 3.616 + 0.03667 DAP | 83.1 | 84.6 | 0.696 | 0.205 | Gompertz |
| 107 | - 9.620 + 0.09628 DAP | - 3.121 + 0.03001 DAP | 92.5 | 95.2 | 0.360 | 0.088 | Gompertz |
| 108 | - 10.47 + 0.09812 DAP | - 3.310 + 0.02999 DAP | 69 | 69.6 | 0.861 | 0.259 | Logistic |
| 109 | - 11.40 + 0.1195 DAP | - 3.855 + 0.04055 DAP | 86.8 | 84.8 | 0.610 | 0.225 | Logistic |
| 110 | - 5.808 + 0.04660 DAP | - 2.151 + 0.01727 DAP | 79.9 | 78.5 | 0.306 | 0.118 | Logistic |
| 111 | - 8.103 + 0.08152 DAP | - 2.743 + 0.02687 DAP | 80.5 | 87.8 | 0.53 | 0.131 | Gompertz |

Continued Appendix Table 8

| Gen | Agarfa | | R2 | R2 | SE | SE |  |
| --- | --- | --- | --- | --- | --- | --- | --- |
| Logistic | Gompertz | Logistic | Gompertz | Logistic | Gompertz | Selected model |
| 111 | - 8.103 + 0.08152 DAP | - 2.743 + 0.02687 DAP | 80.5 | 87.8 | 0.53 | 0.131 | Gompertz |
| 112 | - 10.13 + 0.1034 DAP | - 3.238 + 0.03176 DAP | 91.1 | 94 | 0.422 | 0.105 | Gompertz |
| 113 | - 7.802 + 0.08838 DAP | - 3.344 + 0.04054 DAP | 94 | 93.1 | 0.294 | 0.144 | Logistic |
| 114 | - 10.39 + 0.1070 DAP | - 3.454 + 0.03491 DAP | 95.5 | 93.9 | 0.306 | 0.117 | Logistic |
| 115 | - 7.905 + 0.07404 DAP | - 2.602 + 0.02304 DAP | 83.1 | 88.1 | 0.437 | 0.111 | Gompertz |
| 116 | - 9.400 + 0.09583 DAP | - 3.009 + 0.02943 DAP | 77.6 | 79.7 | 0.674 | 0.195 | Gompertz |
| 117 | - 8.544 + 0.08891 DAP | - 2.907 + 0.02976 DAP | 81.3 | 88.8 | 0.559 | 0.138 | Logistic |
| 118 | - 13.68 + 0.1722 DAP | - 5.727 + 0.17716 DAP | 94.3 | 96.6 | 0.557 | 0.189 | Gompertz |
| 119 | - 13.09 + 0.1579 DAP | - 5.035 + 0.06390 DAP | 93.6 | 93.6 | 0.542 | 0.219 | Gompertz |
| 120 | - 4.679 + 0.03735 DAP | - 1.776 + 0.01439 DAP | 82.7 | 85.9 | 0.223 | 0.076 | Gompertz |
| 121 | - 9.507 + 0.09189 DAP | - 3.007 + 0.02741 DAP | 91.3 | 93.3 | 0.371 | 0.096 | Gompertz |

Appendix Table 9: Combining means performance of Bread wheat genotypes for agronomic traits

| Gen | DH | PH | DM | SPS | SPL | NPT | NSPS | TKW | GY |
| --- | --- | --- | --- | --- | --- | --- | --- | --- | --- |
| 1 | 71.75c-p | 80.13j-x | 120.75 c-h | 18.88c-i | 8.63 a-d | 2.25 b-e | 50.94 a-c | 32.15 h-u | 3.11 u-K |
| 2 | 70.75g-q | 85.44c-t | 122.00 b-e | 18.38c-m | 8.44 a-e | 3.00 a-e | 45.88 a-h | 32.95 g-t | 3.69 j-E |
| 3 | 71.25e-q | 86.63b-r | 120.50 c-h | 16.88i-u | 8.81 abc | 3.25 ab | 44.25 a-h | 30.00 m-D | 3.61 m-G |
| 4 | 72.75b-m | 81.75f-w | 120.75 c-h | 18.63c-k | 8.25 a-f | 2.50 b-e | 44.94 a-h | 30.95 i-A | 4.75 d-l |
| 5 | 70.75g-q | 89.56a-j | 119.75 c-h | 17.38f-t | 7.8125 a-f | 2.50 b-e | 48.31 a-f | 33.43 g-r | 5.66 b-e |
| 6 | 70.75g-q | 85.06c-u | 121.00 c-h | 17.50e-s | 8.44 a-e | 2.63 b-e | 43.25 a-i | 34.83 e-o | 4.20 g-u |
| 7 | 70.25i-q | 81.13g-w | 119.00fgh | 16.38m-w | 8.44a-e | 3.25 ab | 41.50 a-i | 34.95 e-n | 4.31 g-r |
| 8 | 73.00a-l | 85.13 c-u | 121.50 b-g | 19.38b-f | 8.25 a-f | 2.75 a-e | 42.75a-i | 33.70 g-q | 4.41 g-q |
| 9 | 72.00 b-p | 83.31e-v | 119.75c-h | 18.50c-l | 8.63a-d | 2.75 a-e | 42.81 a-i | 36.60 c-j | 4.08 g-x |
| 10 | 72.75b-m | 85.94b-s | 120.75c-h | 20.25abc | 8.313 a-f | 2.50 b-e | 52.44 a | 31.60 i-x | 5.04 c-h |
| 11 | 72.50b-n | 84.19d-v | 121.25c-h | 19.00b-h | 8.63 a-d | 2.75 a-e | 47.75 a-g | 31.05 i-z | 3.4780 n-H |
| 12 | 71.50d-q | 84.88c-u | 119.75c-h | 16.06p-w | 8.31a-f | 2.75 a-e | 48.13 a-g | 29.80 m-E | 4.39 g-q |
| 13 | 72.50b-n | 85.94b-s | 121.00c-h | 19.00b-h | 8.00a-f | 2.75- a-e | 50.75 a-d | 28.70 o-K | 4.23 g-t |
| 14 | 72.25b-o | 80.63h-x | 120.75c-h | 21.50a | 8.06a-f | 2.25 b-e | 45.69 a-h | 29.400 n-I | 5.14c-g |
| 15 | 71.25e-q | 82.32f-v | 121.00c-h | 17.69e-r | 8.38 a-e | 2.31 b-e | 51.94 ab | 29.75 m-E | 3.94 hA |
| 16 | 71.00f-q | 83.56e-v | 119.50d-h | 18.50c-l | 8.38a-e | 2.75 a-e | 44.56 a-h | 32.05 h-v | 4.77 d-k |
| 17 | 75.50ab | 85.88b-s | 119.75c-h | 18.88c-i | 8.88ab | 2.38 b-e | 46.06 a-h | 27.60q-L | 2.33 I-R |
| 18 | 72.50b-n | 83.98d-v | 119.75c-h | 17.00h-u | 7.69 a-f | 2.25 b-e | 42.13 a-i | 27.15s-L | 3.34 p-J |
| 19 | 69.50l-q | 92.88a-e | 121.50b-g | 16.38m-w | 8.19 a-f | 2.63 b-e | 40.19 a-i | 26.15 u-O | 2.54 F-P |
| 20 | 70.00j-q | 88.19a-n | 119.50d-h | 16.63k-v | 7.81a-f | 2.88 a-e | 44.06 a-i | 32.20 h-u | 3.66 k-F |
| 21 | 72.25b-o | 86.00b-s | 120.50c-h | 16.50l-v | 8.13 a-f | 2.94 a-e | 42.750 a-i | 35.80 d-m | 6.29 ab |
| 22 | 72.50b-n | 83.94d-v | 119.50d-h | 15.38t-x | 7.81 a-f | 2.25 b-e | 46.63 a-g | 31.10 i-z | 3.80 i-D |
| 23 | 69.25m-q | 89.94a-i | 121.00c-h | 17.13h-u | 8.62 a-d | 2.75 a-e | 41.25 a-i | 31.25 i-z | 3.86 i-C |
| 24 | 68.00q | 83.44e-v | 125.50a | 17.13h-u | 8.13 a-f | 2.63 b-e | 41.69 a-i | 26.15 u-O | 3.85 i-C |
| 25 | 71.75c-p | 87.69b-o | 75.00c-h | 17.75e-r | 7.75a-f | 2.25 b-e | 39.63 a-i | 28.10 q-K | 3.62 m-G |
| 26 | 69.50l-q | 87.82b-o | 75.00b-f | 16.50i-v lmnopqrstuv | 8.5625a-d abcd | 2.50 b-e bcde | 45.63 a-d abcdefgh | 36.45 d- K kkkdefghijk defghijk | 5.58 b-f bcdef |
| 27 | 69.75k-q | 91.19a-f | 122.5bc | 17.50e-s | 8.63 a-d | 2.69 b-e | 47.63 a-g | 43.20 ab | 5.95 a-c |
| **CV** | **2.792** | **6.26** | **1.261** | **6.427** | **8.56** | **22.79** | **17.03** | **11.77** | **18.18** |
| **Mean** | **71.72** | **84.56** | **120.52** | **17.33** | **8.19** | **2.65** | **42.30** | **28.94** | **3.45** |
|  |  |  |  |  |  |  |  |  |  |

**Appendix Table 9: Continued**

| Gen | DH | PH | DM | SPS | SPL | NPT | NSPS | TKW | GY |
| --- | --- | --- | --- | --- | --- | --- | --- | --- | --- |
| 28 | 70.75 g-q | 88.56 a-m | 119.25e-h | 16.75j-u | 8.38 a-e | 2.81a-e | 41.63 a-i | 28.45p-K | 3.64 l-G |
| 29 | 70.75 g-q | 84.06 d-v | 121.25 c-h | 17.75 e-r | 8.38 a-e | 2.63 b-e | 43.88 a-i | 42.15a-c | 6.58 ab |
| 30 | 72.75b-m | 94.25 a-c | 120.00 c-h | 16.63 k-v | 8.94 a | 2.31b-e | 44.19a-h | 31.70 i-x | 4.54 f-o |
| 31 | 69.50 l-q | 85.13c-u | 120.50 c-h | 16.13o-w | 8.50 a-d | 3.25a-b | 49.88a-e | 30.25 l-C | 4.18 g-v |
| 32 | 70.75 g-q | 82.69 f-v | 120.75 c-h | 14.75 v-x | 7.8125 a-f | 2.0 e | 44.19 a-h | 33.0 g-s | 3.85i-C |
| 33 | 69.50 l-q | 76.88 s-x | 121.50 b-g | 17.38 f-t | 7.75 a-f | 2.25 b-e | 33.06 h-i | 20.150 O-S | 1.38 Q-U |
| 34 | 71.25 e-q | 89.19 a-k | 122.25 b-d | 17.25g-u | 8.50 a-d | 2.00 e | 44.19 a-h | 29.65 n-F | 3.73 j-D |
| 35 | 69.75 kq | 90.75a-g | 121.00 c-h | 18.75 c-j | 7.9375 a-f | 2.94 a-e | 43.00 a-i | 36.70c-j | 4.09 g-w |
| 36 | 72.75bm | 84.06 dv | 119.50 d-h | 18.75c-j | 8.50 a-d | 2.75a-e | 40.69 a-i | 28.90 n-J | 3.15t-K |
| 37 | 70.25i-q | 83.44 e-v | 121.00 c-h | 19.38 b-f | 8.19 a-f | 2.88 a-e | 39.63 a-i | 16.95 ST | 1.93 L |
| 38 | 71.75 c-p | 81.56 f-w | 121.25 c-h | 17.50 e-s | 7.88 a-f | 3.25 a-b | 41.44 a-i | 30.20 m-C | 4.11 g-w |
| 39 | 71.00 f-q | 84.06 d-v | 121.00 c-h | 17.63 er | 7.88 a-f | 2.63 be | 48.56 a-f | 34.90 en | 4.56 f-n |
| 40 | 70.25i-q | 83.6e-v | 122.50 b-c | 18.75 c-j | 7.625 b-f | 2.62 b-e | 44.75 a-h | 31.50i-y | 4.03g-y |
| 41 | 70.25i-q | 75.56u-x | 122.00b-e | 17.13 h-u | 7.44def | 2.50 b-e | 46.00a-h | 38.30b-g | 4.57f-n |
| 42 | 71.00 f-q | 83.13 f-v | 120.00 c-h | 16.75 j-u | 8.18 a-f | 2.18 b-e | 38.00 c-i | 41.00a-d | 5.79 bcd |
| 43 | 70.25 i-q | 72.50w-x | 122.50b-c | 15.38t-x | 7.18e-f | 2.50 b-e | 40.81a-i | 27.150 s-L | 4.24g-t |
| 44 | 70.25 i-q | 80.50 i-x | 121.00 c-h | 16.75 j-u | 8.18a-f | 2.50 b-e | 41.44 a-i | 42.15abc | 6.81 a |
| 45 | 72.0 b-p | 88.75 a-k | 121.75 b-f | 19.50 b-e | 8.0625 a-f | 3.00 a-e | 45.13 a-h | 37.75 b-h | 5.77bcd |
| 46 | 70.50 h-q | 85.31c-t | 120.75 c-h | 17.75 e-r | 8.1875 a-f | 3.00 a-e | 39.00 b-i | 26.35 u-N | 4.18 g-u |
| 47 | 71.00f-q | 83.8125 e-v | 124.00ab | 17.13 h-u | 8.25a-f | 2.75 a-e | 47.19 a-g | 25.400y-P | 2.17K-S |
| 48 | 70.50h-q | 87.06b-q | 120.75c-h | 16.13 o-w | 7.88a-f | 2.75a-e | 43.75a-i | 32.85 g-t | 3.22 r-K |
| 49 | 68.75opq | 81.69 fw | 122.50 bc | 14.00x | 7.8750 a-f | 3.25a-b | 41.88 a-i | 33.35g-r | 3.29 q-K |
| 50 | 69.00n-q | 86.00b-s | 125.00a | 17.38 f-t | 7.94a-f | 2.0 e | 47.00a-g | 39.700b-f | 4.65 e-m |
| 51 | 74.00 a-h | 83.81e-v | 119.50d-h | 18.25d-n | 8.13a-f | 3.00 a-e | 45.81 a-h | 30.45k-C | 3.01 w-M |
| 52 | 73.00 a-l | 81.31g-w | 118.50h | 16.63k-v | 7.81 a-f | 2.25 b-e | 46.94 a-g | 24.80A-Q | 3.32q-K |
| 53 | 73.75 a-i | 90.69 a-g | 120.00 c-h | 19.00 b-h | 8.56 a-d | 2.25b-e | 41.94 a-i | 29.90m-E | 3.16s-K |
| 54 | 72.50 b-n | 82.88f-v | 119.25 e-h | 17.88 e-q | 8.19a-f | 2.44b-e | 35.50f-i | 25.95 v-O | 2.46 H-Q |
| **CV** | **2.792** | **6.26** | **1.261** | **6.427** | **8.56** | **22.79** | **17.03** | **11.77** | **18.18** |
| **Mean** | **71.72** | **84.56** | **120.52** | **17.33** | **8.19** | **2.65** | **42.30** | **28.94** | **3.45** |

**Appendix Table 9: Continued**

| Gen | DH | PH | DM | SPS | SPL | NPT | NSPS | TKW | GYD |
| --- | --- | --- | --- | --- | --- | --- | --- | --- | --- |
| 55 | 73.75 a-i | 81.31g-w | 119.50 d-h | 18.13 d-o | 8.82a-c | 2.56 b-e | 38.63 c-i | 19.05 QRS | 1.62O-T |
| 56 | 74.75 a-e | 74.94 v-x | 120.50 c-h | 16.875i-u | 7.06 f | 2.94 a-e | 44.88 a-h | 25.55 x-P | 2.87z-N |
| 57 | 72.25 b-o | 82.4f-v | 121.00 c-h | 17.25g-u | 7.50 d-f | 2.50 b-e | 41.56 a-i | 17.25RST | 1.62 O-T |
| 58 | 72.00 b-p | 83.0 f-v | 120.50 c-h | 16.25 n-w | 8.188 a-f | 2.00 e | 40.50 a-i | 30.40 k-C | 5.01 c-h |
| 59 | 72.50 b-n | 87.56 b-o | 119.25e-h | 17.13h-u | 8.250a-f | 2.50 b-e | 37.75 c-i | 27.400 r-L | 4.284 g-s |
| 60 | 72.50 b-n | 86.19b-s | 120.75c-h | 16.7500j-u | 8.81 abc | 2.44 b-e | 37.18 e-i | 27.60q-L | 3.74 j-D |
| 61 | 71.50 d-q | 78.88 m-x | 121.50 b-g | 18.75c-j | 8.44a-e | 3.00 ae | 41.1250 ai | 28.10 q-K | 3.43 o-I |
| 62 | 69.00 n-q | 89.06a-k | 122.50  b-c | 16.00 p-w | 8.1250 a-f | 2.63b-e | 42.31 a-i | 40.55 be | 4.52 g-o |
| 63 | 71.25 e-q | 88.13 a-o | 121.50 b-g | 17.75 e-r | 8.38a-e | 2.25b-e | 36.44 f-i | 23.45 G-Q | 2.404H-Q |
| 64 | 71.00 f-q | 91.19a-f | 120.00 c-h | 16.75 j-u | 8.25a-f | 2.13 cde | 39.69 a-i | 29.50 n-H | 2.84 A-N |
| 65 | 70.50 h-q | 78.44 o-x | 121.50 b-g | 15.50s-x | 8.13a-f | 2.06 de | 36.44 f-i | 23.80E-Q | 2.30 I-R |
| 66 | 71.50d-q | 82.69 f-v | 120.00 c-h | 17.89e-q | 8.56a-d | 2.75a-e | 41.13a-i | 25.23 z-P | 2.87z-N |
| 67 | 73.25 a-k | 79.0 l-x | 119.00f-h | 17.25g-u | 8.18a-f | 3.00a-e | 40.50 a-i | 20.40 N-S | 1.128 S-U |
| 68 | 72.25b-o | 77.75p-x | 119.50d-h | 16.63kv | 8.25a-f | 2.50b-e | 40.69a-i | 29.55 n-G | 3.718 j-E |
| 69 | 73.00a-l | 81.25g-w | 119.25e-h | 17.25g-u | 8.44a-e | 2.50b-e | 46.25a-h | 34.65f-o | 3.99 h-z |
| 70 | 71.50 d-q | 86.44b-s | 119.50 d-h | 16.12o-w | 8.63a-d | 2.50b-e | 43.31a-i | 25.85w-P | 2.54 F-P |
| 71 | 74.00a-h | 83.31e-v | 119.50 d-h | 17.50e | 8.13a-f | 2.50b-e | 38.56c-i | 36.35d-l | 4.25 g-t |
| 72 | 70.25 i-q | 83.44e-v | 121.50 b-g | 15.75r-x | 8.69a-d | 2.75a-e | 42.81a-i | 30.95i-A | 3.33p-J |
| 73 | 71.75c-p | 88.06a-o | 121.50 b-g | 17.00u | 8.06a-f | 2.25b-e | 39.25a-i | 34.55fp | 2.93y-M |
| 74 | 70.50 h-q | 88.75a-k | 121.25 c-h | 16.19o-w | 7.88a-f | 2.75a-e | 47.82a-g | 23.30I-Q | 2.59E-P |
| 75 | 70.75 g-q | 83.44e-v | 122.50  b-c | 16.13o-w | 8.19 a-f | 2.75a-e | 41.44a-i | 36.85c-i | 3.42o-I |
| 76 | 72.75 b-m | 89.69a-j | 119.00 f-h | 18.38c-m | 8.56a-d | 3.81a | 40.81a-i | 31.05iz | 4.91di |
| 77 | 73.75 a-i | 86.50 b | 118.75g-h | 17.75e-r | 8.56 a-d | 2.75a | 41.44 a-i | 30.9 i-A | 4.27 g-t |
| 78 | 71.25 e-q | 85.75b-s | 119.75 c-h | 16.06p-w | 8.44a-e | 2.75 a-e | 42.31a-i | 28.45p-K | 2.83 A-N |
| 79 | 71.75 c-p | 82.18f-v | 120.00 c-h | 15.88q-w | 8.06a-f | 2.875a-e | 39.63 a-i | 30.65jB | 2.69 D-O |
| 80 | 72.50 b-n | 84.44d-v | 119.00f-h | 14.50 w-x | 8.44a-e | 2.56b-e | 44.81a-h | 26.65u-M | 2.87 z-N |
| 81 | 74.25 a-g | 83.81e-v | 121.50 b-g | 17.63e-r | 8.00a-f | 2.75a-e | 45.19a-h | 31.80h-w | 4.25 g-t |
| **CV** | **2.792** | **6.26** | **1.261** | **6.427** | **8.56** | **22.79** | **17.03** | **11.77** | **18.18** |
| **Mean** | **71.72** | **84.56** | **120.52** | **17.33** | **8.19** | **2.65** | **42.30** | **28.94** | **3.45** |
|  |  |  |  |  |  |  |  |  |  |

**Appendix Table 9: Continued**

| Gen | DH | PH | DM | SPS | SPL | NPT | NSPS | TKW | GY |
| --- | --- | --- | --- | --- | --- | --- | --- | --- | --- |
| 82 | 73.25 a-k | 83.00 f-v | 119.75c-h | 16.6k-v | 8.56a-d | 3.00a-e | 40.81a-i | 19.85P-S | 1.78N-T |
| 83 | 72.00b-p | 90.25a-h | 120.00 c-h | 18.00e-p | 8.00 a-f | 3.00a-e | 44.44a-h | 30.4k-C | 3.93h-B |
| 84 | 70.25 i-q | 87.19b-p | 120.00c-h | 16.13o-w | 8.38a-e | 2.50b-e | 38.63c-i | 33.05g-s | 3.83i-C |
| 85 | 74.00 a-h | 82.19f-v | 121.50b-g | 17.38f-t | 8.50ad | 2.44b-e | 42.06a-i | 20.90M-S | 2.54F-P |
| 86 | 70.75 gq | 90.00a-i | 121.25 c-h | 17.13h-u | 7.75a-f | 2.50b-e | 41.63a-i | 33.45g-r | 3.77 j-D |
| 87 | 74.50 af | 86.00b-s | 120.50 c-h | 17.3750 f-t | 7.94a-f | 3.13a-d | 44.56 a-h | 34.80e-o | 4.80 d-j |
| 88 | 70.75 gq | 80.50i-x | 120.00c-h | 16.75j-u | 7.88a-f | 2.56b-e | 41.50a-i | 26.80t-M | 2.41H-Q |
| 89 | 73.75a-i | 77.06r-x | 118.75g-h | 17.75e-r | 8.00 a-f | 2.50b-e | 45.19a-h | 30.70j-B | 3.17sK |
| 90 | 74.50a-f | 79.00l-x | 120.25c-h | 19.25b-g | 8.13a-f | 3.25 a-b | 42.44a-i | 23.55F-Q | 3.35p-J |
| 91 | 73.50a-j | 84.38d-v | 120.25c-h | 19.38b-f | 8.56a-d | 2.56b-e | 37.43e-i | 23.63F-Q | 2.42H-Q |
| 92 | 70.75g-q | 83.19e-v | 119.25e-h | 18.25d-n | 8.06a-f | 2.25b-e | 42.93a-i | 30.40k-C | 3.17s-K |
| 93 | 72.25b-o | 85.88b-s | 121.25c-h | 16.75j-u | 7.94a-f | 3.25a-b | 42.00a-i | 26.150u-O | 3.21r-K |
| 94 | 73.00 a-l | 80.63h-x | 120.50c-h | 17.25g-u | 7.88a-f | 2.50b-e | 40.88a-i | 24.6B-Q | 3.00w-M |
| 95 | 74.00 a-h | 83.63e-v | 119.25e-h | 17.25g-u | 8.06a-f | 3.19 a-c | 37.25e-i | 27.75q-K | 3.05v-L |
| 96 | 73.00 a-l | 86.63b-r | 119.75 c-h | 18.25d-n | 7.94a-f | 2.88a-e | 46.63a-g | 27.5r-L | 2.9y-M |
| 97 | 71.25e-q | 81.56 f-w | 119.50dh | 16.13o-w | 7.56c-f | 2.75a-e | 40.94a-i | 26.2u-O | 2.77 C-N |
| 98 | 68.50p-q | 88.25a-n | 120.00 c-h | 15.88q-w | 8.06a-f | 2.75a-e | 42.69a-i | 26.50 u-M | 2.91 y-M |
| 99 | 69.75 k-q | 81.44g-pw | 119.75 c-h | 16.38m-w | 8.13a-f | 2.750a-e | 42.81a-i | 23.60F-Q | 2.43H-Q |
| 100 | 73.00a-l | 84.94c-u | 120.25 ch | 17.00hu | 8.88ab | 3.00a-e | 44.44a-h | 45.95 a | 6.49 ab |
| 101 | 69.00n-q | 87.19bp | 121.50 bg | 16.88iu | 7.94af | 2.81a-e | 30.94 i | 23.0 J-Q | 1.11T-U |
| 102 | 75.25abc | 85.81 bs | 119.50 dh | 16.88iu | 7.75a-f | 3.00a-e | 39.25 a-i | 23.55F-Q | 2.53G-P |
| 103 | 72.25b-o | 80.50 ix | 120.00 ch | 20.00ad | 7.88 af | 2.25 b-e | 36.94e-i | 22.85J-R | 2.26J-R |
| 104 | 75.00 a-d | 88.38an | 119.00f-h | 20.75ab | 8.94a | 2.50b-e | 40.00a-i | 2.0 h-w | 3.719 j-E |
| 105 | 71.25 eq | 88.63al | 120.75 ch | 17.63e-r | 8.44a-e | 2.75a-e | 38.81b-i | 25.40y-P | 1.91M-T |
| 106 | 73.25 a-k | 97.31 a | 120.00 ch | 15.25ux | 8.69a-d | 3.00a-e | 39.50a-i | 30.80i-A | 4.44g-p |
| 107 | 70.75g-q | 77.38qx | 120.25 ch | 17.13hu | 8.50a-d | 3.00a-e | 43.75a-i | 22.75K-R | 1.93M-T |
| 108 | 73.75 a-i | 79.56 kvx | 119.75 ch | 17.6er | 8.13a-f | 2.50b-e | 40.69a-i | 16.85S-T | 1.52 P-T |
| **CV** | **2.792** | **6.26** | **1.261** | **6.427** | **8.56** | **22.79** | **17.03** | **11.77** | **18.18** |
| **Mean** | **71.72** | **84.56** | **120.52** | **17.33** | **8.19** | **2.65** | **42.30** | **28.94** | **3.45** |

**Appendix Table 9: Continued**

| Gen | DH | DM | PH | SPS | SPL | NPT | NSPS | TKW | GY |
| --- | --- | --- | --- | --- | --- | --- | --- | --- | --- |
| 109 | 74.25 a-g | 90.25a-h | 119.50d-h | 17.00h-u | 8.25 a-f | 2.69 b-e | 38.31 c-i | 22.80 J-R | 3.59 m-G |
| 110 | 71.25 e-q | 83.88 d-v | 119.50 d-h | 17.88 e-q | 8.3125 a-f | 3.25 ab | 40.88 a-i | 25.35y-P | 2.80 B-N |
| 111 | 69.25m-q | 86.19b-s | 121.25 c-h | 15.88q-w | 8.2500 a-f | 2.75 a-e | 39.94 a-i | 24.0D-Q | 2.83 A-N |
| 112 | 70.00 j-q | 93.50 a-d | 120.50 c-h | 17.63e-r | 7.9375 a-f | 2.75 a-e | 38.69 b-i | 23.40H-Q | 2.95x-M |
| 113 | 73.50 a-j | 95.31ab | 119.25 e-h | 18.75c-j | 8.38a-e | 2.75a-e | 41.00a-i | 23.90D-Q | 1.96L-T |
| 114 | 72.00 b-p | 87.38 b-p | 121.50 b-g | 17.3750 f-t | 8.25a-f | 2.50b-e | 34.88g-i | 30.0m-D | 3.11u-K |
| 115 | 71.00 f-q | 71.50 x | 120.00 c-h | 16.50 l-v | 7.81a-f | 2.25b-e | 37.06 e-i | 17.15R-T | 1.3 R-U |
| 116 | 73.00 a-l | 76.00 t-x | 120.00 c-h | 18.13d-o | 7.94 a-f | 2.50b-e | 6 37.50 d-i | 12.30 T | 0.48U |
| 117 | 70.75g-q | 89.69 a-j | 120.00 c-h | 17.75e-r | 8.88ab | 2.69 b-e | 41.75a-i | 24.35C-Q | 2.41H-Q |
| 118 | 73.50 a-j | 78.75n-x | 120.00 c-h | 15.88 q-w | 8.00a-f | 2.25b-e | 37.44 e-i | 16.35ST | 0.96 TU |
| 119 | 76.50 a | 81.88 f-w | 121.00 c-h | 17.38 f-t | 7.63 b-f | 3.00 a-e | 42.50a-i | 21.50L-S | 1.00 TU |
| 120 | 69.25 m-q | 85.69 c-s | 120.00 c-h | 17.38 f-t | 8.13a-f | 2.69b-e | 44.88a-h | 19.9 P-S | 2.41 H-Q |
| 121 | 70.00 j-q | 87.19b-p | 119.50 d-h | 16.88i-u | 8.13a-f | 2.63 b-e | 39.31a-i | 31.25i-z | 3.39p-J |
| **CV** | **2.792** | **6.26** | **1.261** | **6.427** | **8.56** | **22.79** | **17.03** | **11.77** | **18.18** |
| **Mean** | **71.72** | **84.56** | **120.52** | **17.33** | **8.19** | **2.65** | **42.30** | **28.94** | **3.45** |
